# Supplementary material for: Facile synthesis of deuterium-labeled denatonium cation and its application in the quantitative analysis of Bitrex by liquid chromatography-mass spectrometry
Source: PubMed Central journal article supplement (PMC4516867; doi:10.1007/s00216-015-8815-y), 2015-06-16
Supplement: 216_2015_8815_MOESM1_ESM.pdf [file 216_2015_8815_MOESM1_ESM.pdf]

## **Analytical and Bioanalytical Chemistry**

### **Electronic Supplementary Material**

#### **Facile synthesis of deuterium labeled denatonium cation and its application in the quantitative analysis of Bitrex by liquid chromatography-mass spectrometry**

Remigiusz Bąchor, Alicja Kluczyk, Piotr Stefanowicz, Zbigniew Szewczuk

## Materials and Methods

### Chemicals

Denatonium benzoate ( $\geq 98\%$ ), deuterium oxide ( $D_2O$ , 99.9% purity), *N,N,N*-triethylamine (TEA) and acetonitrile (LC/MS grade) were purchased from Sigma-Aldrich (Saint Louis, MO, USA).

### Mass spectrometry

All ESI-MS experiments were performed on a micrOTOF-Q mass spectrometer (Bruker Daltonics, Bremen, Germany) equipped with standard ESI source. The instrument was operated in the positive-ion mode and calibrated with the Tunemix™ mixture (Agilent Technologies, Palo Alto, CA, USA). The mass accuracy was better than 5 ppm. Analyte solution was infused at a flow rate of 3  $\mu$ L/min. The instrument parameters were as follows: scan range: 50-1600  $m/z$ ; drying gas: nitrogen; flow rate: 4.0 L/min, temperature: 200 °C; potential between the spray needle and the orifice: 4.2 kV. For MS spectra analysis, a Bruker Compass DataAnalysis 4.0 software was used.

### Isotopic exchange

HDX was initiated by dissolving 0.1 mg of the analyte in 198  $\mu$ L of  $D_2O$  at room temperature (pD = 7.4). After 20 min, proton from the amide group was exchanged by deuterons, according to ESI-MS analysis. Then TEA (2  $\mu$ L) was added to the solution (pD = 12.3). To observe only the introduced  $\alpha$ -C deuterons the sample was afterwards lyophilized and redissolved in the mixture of 200  $\mu$ L of water/MeCN (1:1, v/v), incubated for 30 min and subjected to ESI-MS analysis.

In order to estimate pD of the analyzed alkaline solutions, pH was measured on a MP230 pH meter (Mettler-Toledo, Greifensee, Switzerland). pD was calculated according to the equation:  $pD = pH + 0.4$  [1].

#### NMR analysis

NMR spectra were recorded on high-field spectrometer Bruker Avance 500 MHz. Complete  $^1H$  NMR,  $^{13}C$  NMR and COSY analysis was performed on each step of denatonium benzoate HDX. Samples were dissolved in  $CDCl_3$ .

#### Liquid Chromatography - Mass Spectrometry (LC-MS) analysis

The Agilent 1200 system, equipped with an Aeris Peptide XB-C18 column (50 mm  $\times$  2.1 mm) 3.6  $\mu m$  bead diameter was used. The LC system was operated with mobile phase: solvent A: 0.1% formic acid in  $H_2O$ ; solvent B: 0.1% formic acid in MeCN. The gradient conditions (B %) were from 0 to 70% B within 20 min. The flow rate was 0.1 mL/min and the injection volume 5  $\mu L$ .

#### Preparation of alcoholic thinner samples for LC-MS analysis

The different volumes of alcoholic thinner (1300, 1000, 700, 500, 200, 50, 30, 20  $\mu L$ ) were evaporated under nitrogen stream and the residue was dissolved in  $H_2O$  (200  $\mu L$ ) before LC-MS analysis. To the 20  $\mu L$  of such solution 2  $\mu L$  of deuterated denatonium benzoate solution in  $H_2O$  (0.5 mg/mL) was added and diluted with  $H_2O$  to the total volume 145  $\mu L$ . the prepared samples were analyzed by LC-MS.

## Preparation of windscreen washer fluids samples for LC-MS analysis

The samples were prepared by the evaporating of 20 mL of each windscreen washer fluid. Then the sample was redissolved in H<sub>2</sub>O (1 mL). To the 20  $\mu$ L of such solution deuterated denatonium benzoate standard (2  $\mu$ L, 0.5 mg/mL) was added. Then the sample was diluted to 145  $\mu$ L with water and analyzed by LC-MS. Samples were evaporated both under nitrogen stream and by speedvac. The time required for evaporation was very short for low-volume samples (within minutes) whereas for larger amounts it took around 1 hour.

## The computational analysis

The quantification of detected denatonium cations in the prepared samples was performed according to the algorithm described by Mirgorodskaya and co-workers [2]. Briefly, the relative concentrations of non-deuterated sample and isotopically labeled standard can be determined by comparing the isotopic distributions of “natural” and labeled compounds with isotopic pattern measured for analyzed sample containing known amount of deuterated standard. To reduce nonsystematical errors resulting from statistical fluctuations the data were analyzed by least squares method basing on abundancies of 6 isotopic peaks found in labeled and unlabeled compound. The computational analysis was performed using ORIGIN 8 program (OriginLab Corporation, Northampton, MA, USA)

## NMR Analysis

In the <sup>1</sup>H NMR spectrum recorded for non-deuterated denatonium benzoate dissolved in CDCl<sub>3</sub> an intensive signal at 4.97 ppm, corresponding to the  $\alpha$ -CH<sub>2</sub> group is present (Fig. 1S A). After the incubation in 1% TEA/D<sub>2</sub>O solution the disappearance of the signal was observed. This clearly indicates that  $\alpha$ -C hydrogens were replaced by deuterons (Fig. 1S B).

This result confirms that the specific deuteration of the  $\alpha$ -C hydrogens takes place in denatonium cation.

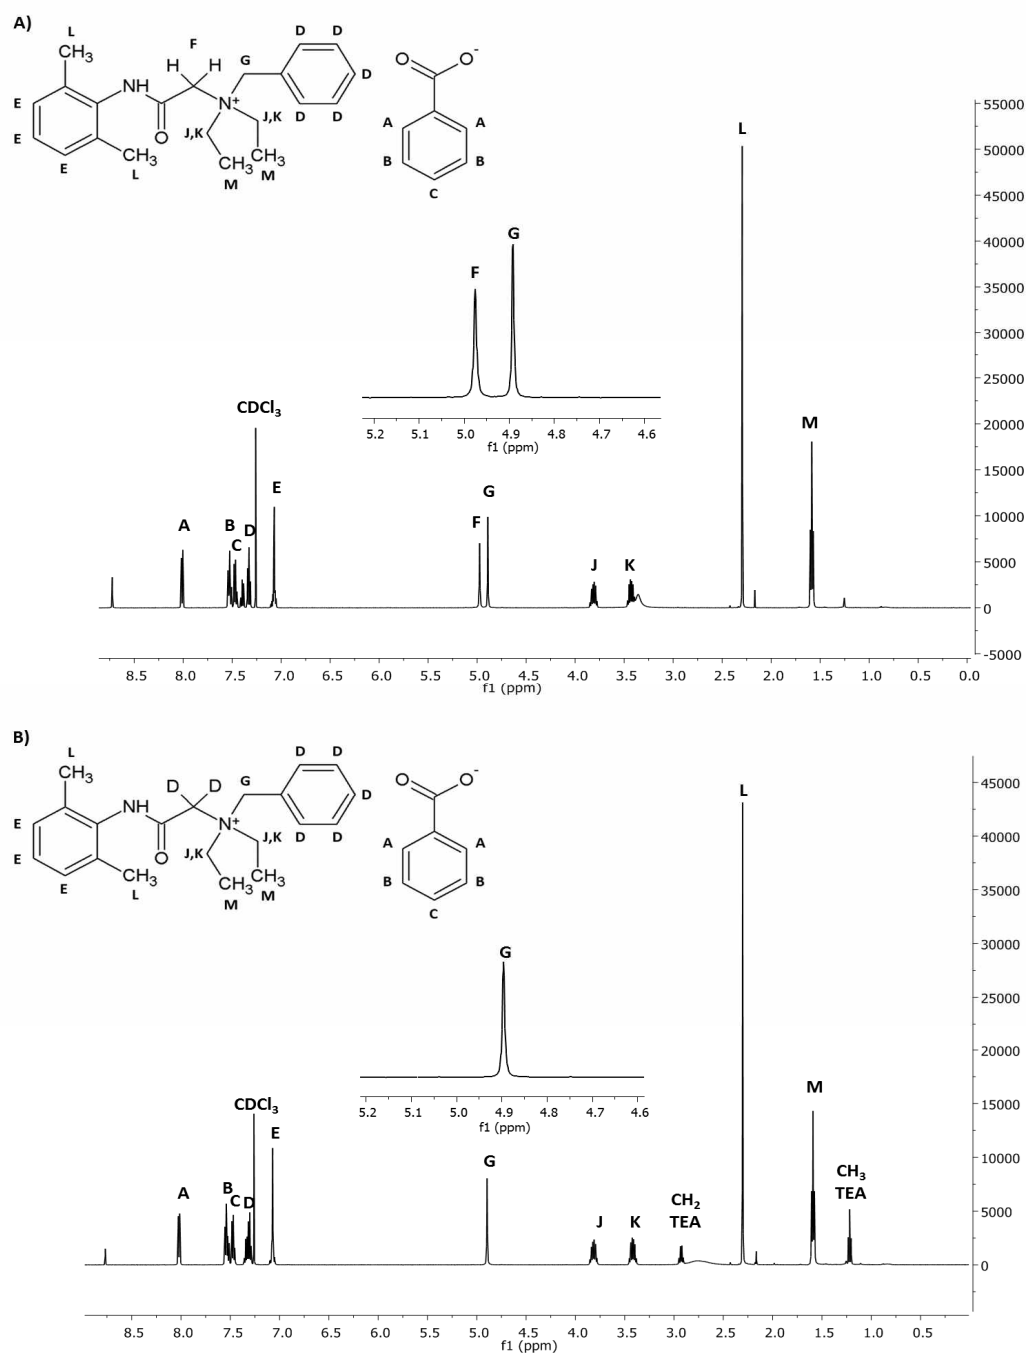

**Fig. S1** The  $^1\text{H}$  NMR spectra of denatonium benzoate before HDX at the  $\alpha$ -C (A) and after incubation in 1% TEA/ $\text{D}_2\text{O}$  solution (B). The changes in resonance of the  $\alpha$ -C hydrogens are presented in inserts. The disappearance of resonance signal at the 4.97 ppm confirms the exchange of the  $\alpha$ -C hydrogens into deuterons (B)

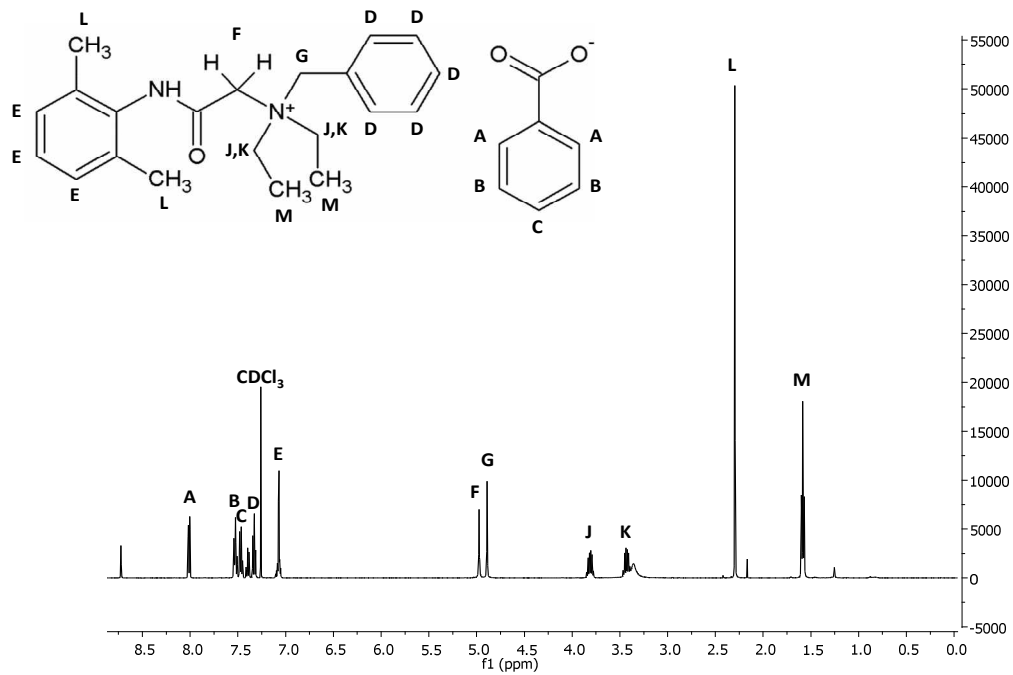

**Fig. S2** The <sup>1</sup>H NMR spectrum of Bitrex dissolved in CDCl<sub>3</sub>

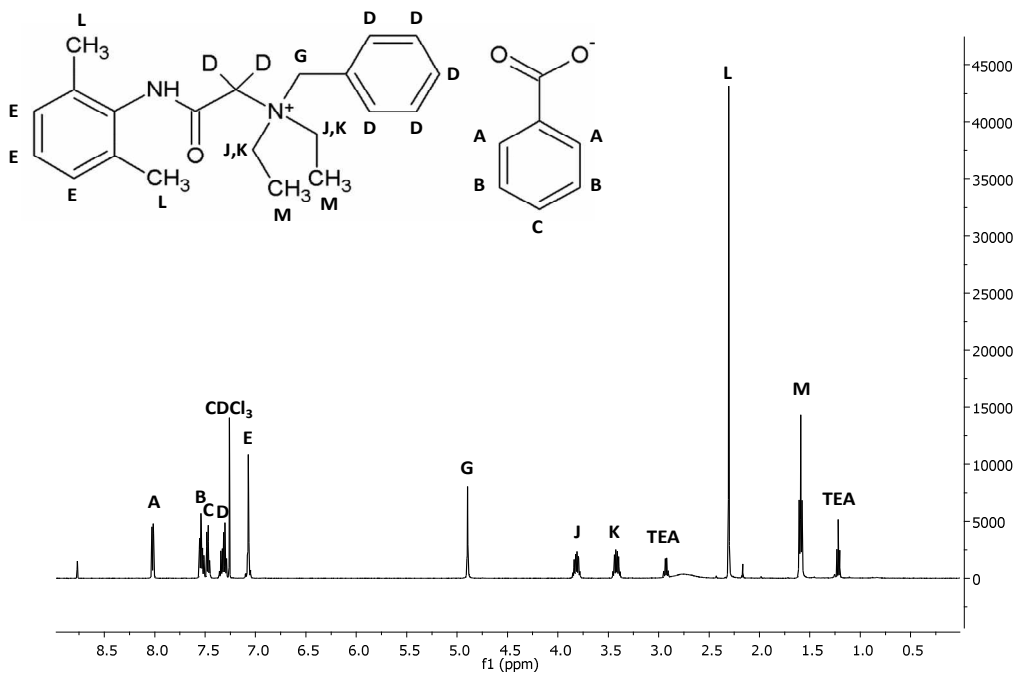

**Fig. S3** The <sup>1</sup>H NMR spectrum of Bitrex after HDX in 1% TEA/D<sub>2</sub>O solution. Sample was dissolved in CDCl<sub>3</sub>

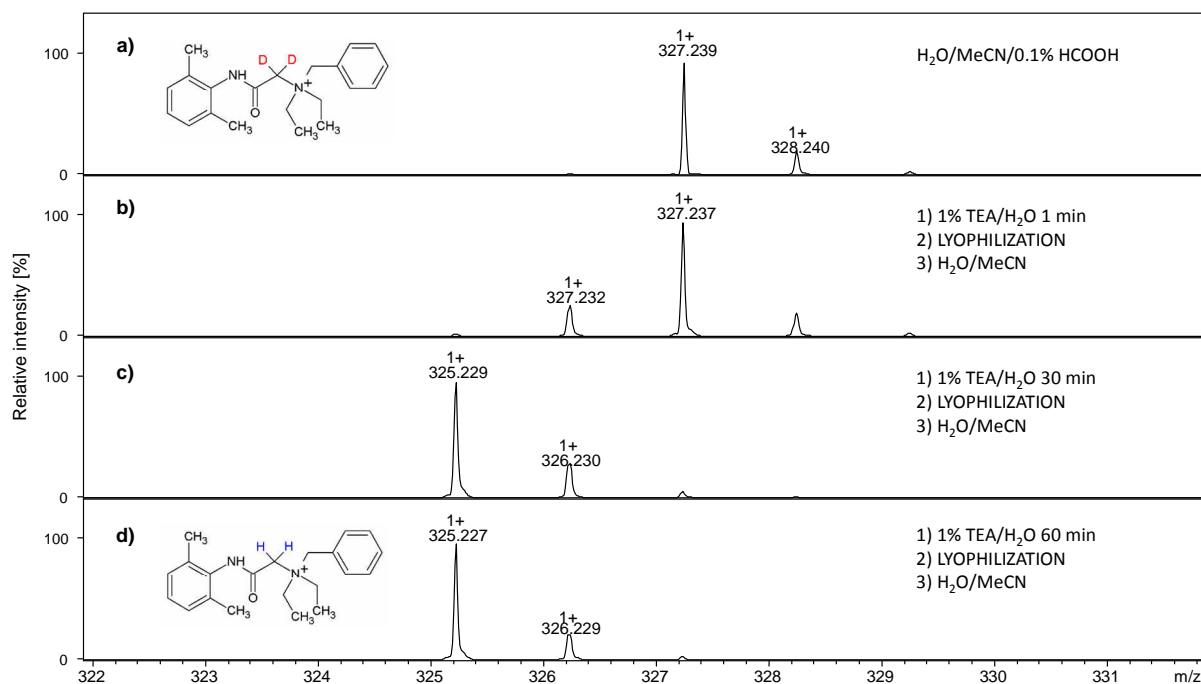

**Fig. S4** ESI-MS spectra in positive ion mode of  $\alpha$ -C deuterated Bitrex dissolved in: a) acetonitrile–water mixture; and after incubation in 1% TEA/ $\text{H}_2\text{O}$  for b) 1 min; c) 30 min; d) 60 min and. After back exchange samples were lyophilized and redissolved in acetonitrile–water

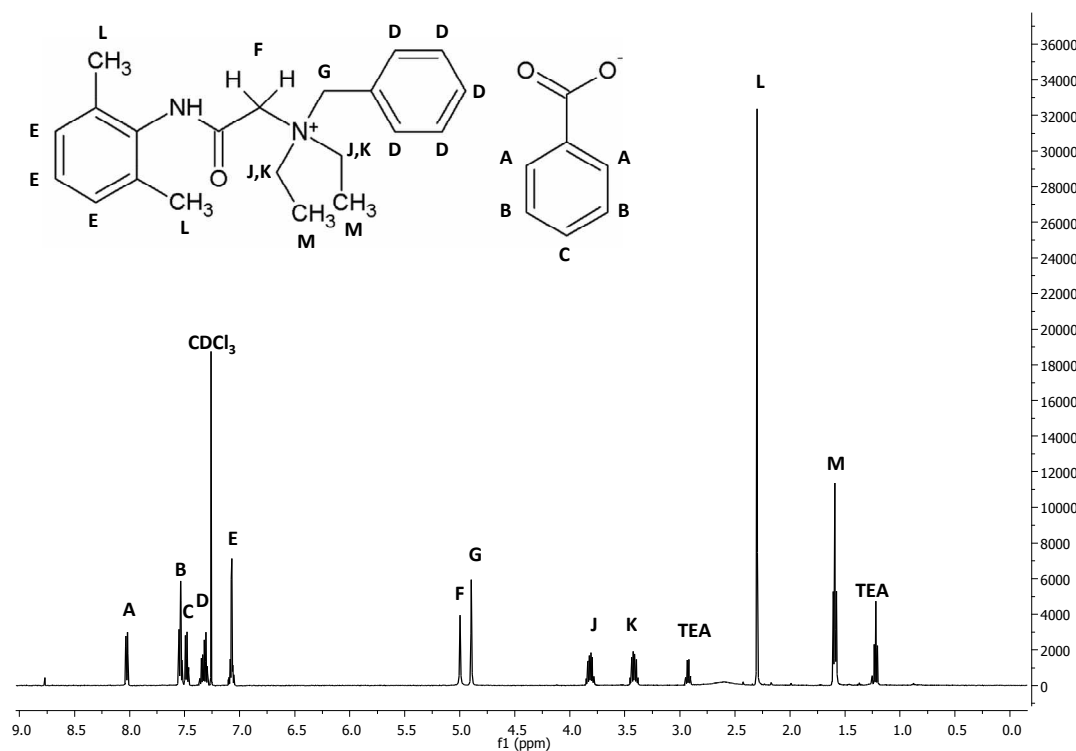

**Fig. S5** The  $^1\text{H}$  NMR spectrum of  $\alpha$ -C deuterated Bitrex after back exchange in 1% TEA/ $\text{H}_2\text{O}$  solution. Sample was dissolved in  $\text{CDCl}_3$

Quaternary ammonium compounds containing strong electron-withdrawing group attached to one of the methylene carbon bound to the quaternary nitrogen have been reported to undergo Stevens rearrangement in the presence of a strong base to give rearranged tertiary amines [3]. Additionally it was found by Ng and co-workers [4] that the presence of 2,6-xylylcarbonyl group close to the quaternary nitrogen atom facilitates the loss of a labile proton from the methylene group with subsequent migration of a benzylic group from the quaternary nitrogen during the GC-MS analysis of denatonium cation. To verify whether Stevens reaction occurs under proposed HDX conditions, the  $^{13}\text{C}$  NMR and 2D NMR experiments were performed for denatonium benzoate sample after a six-hour incubation in 1% TEA/ $\text{D}_2\text{O}$  solution and compared with unexchanged sample (Figs. 6S - 9S). No differences have been found in  $^{13}\text{C}$  and 2D NMR spectra of denatonium benzoate before and after HDX which clearly indicates that Stevens rearrangement does not occur under the reaction conditions.

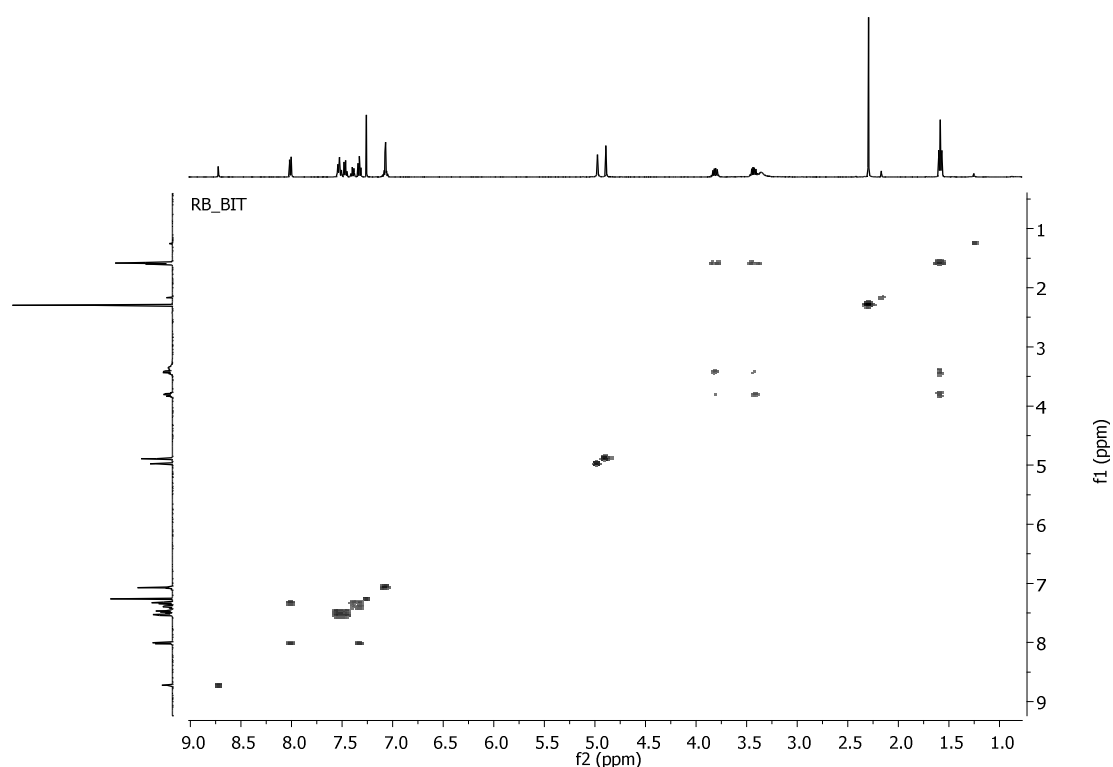

**Fig. S6** The COSY spectrum of Bitrex. Sample was dissolved in  $\text{CDCl}_3$



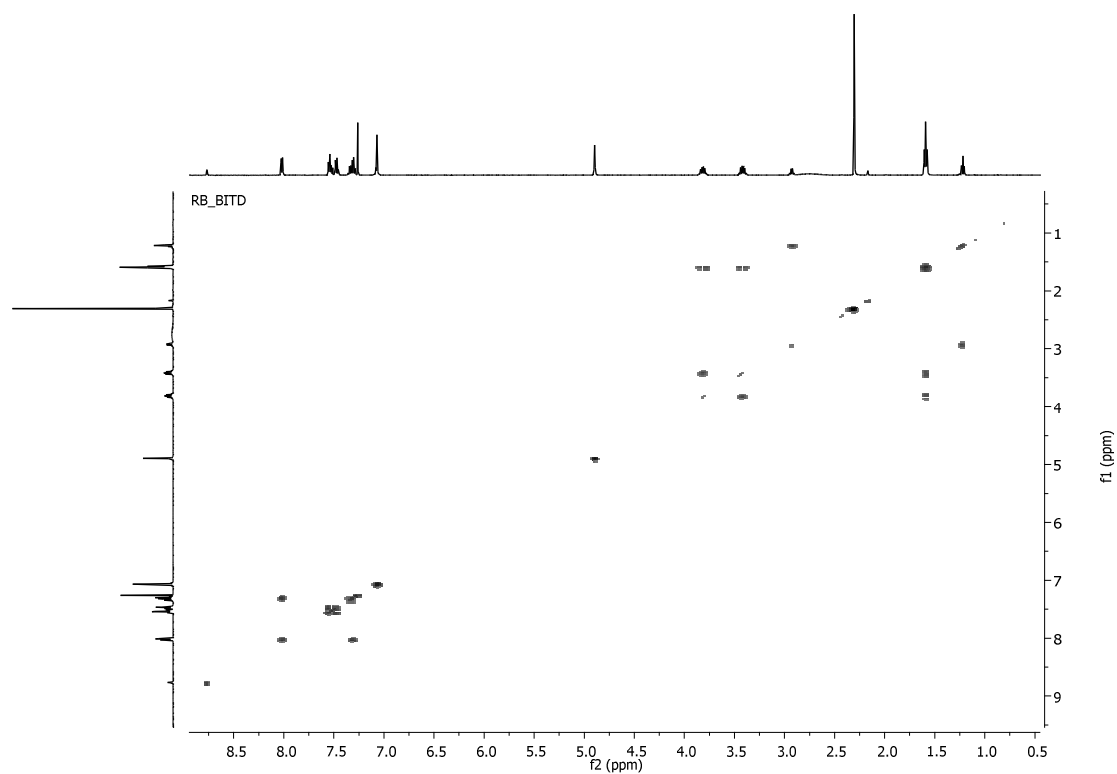

**Fig. S7** The COSY spectrum of  $\alpha$ -C deuterated Bitrex. Sample was dissolved in  $\text{CDCl}_3$

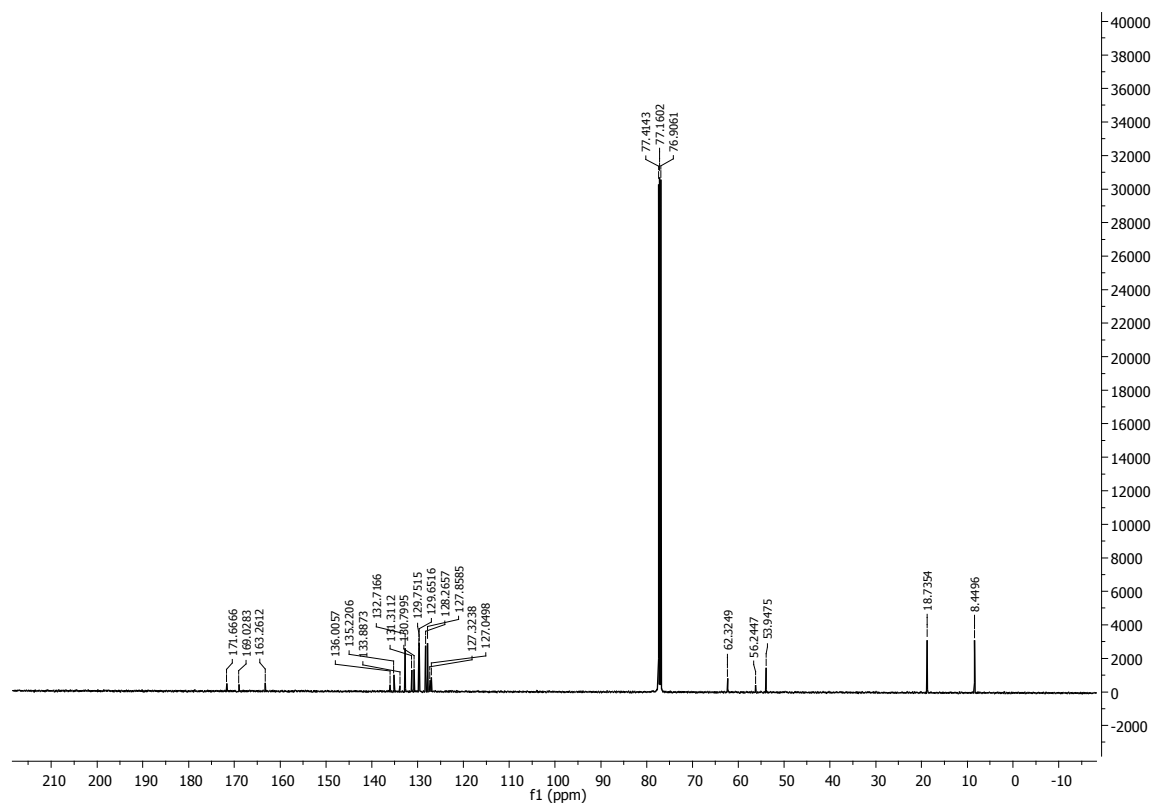

**Fig. S8** The  $^{13}\text{C}$  NMR spectrum of Bitrex. Sample was dissolved in  $\text{CDCl}_3$

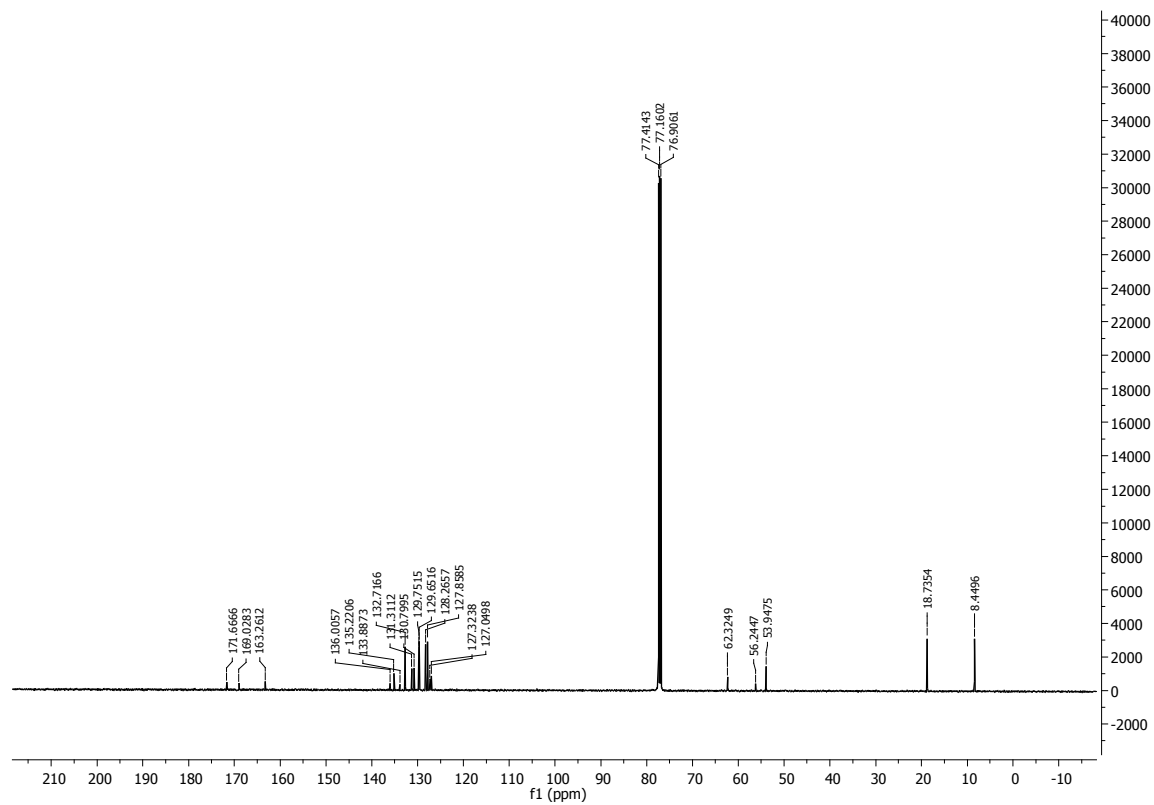

**Fig. S9** The  $^{13}\text{C}$  NMR spectrum of  $\alpha$ -C deuterated Bitrex dissolved in  $\text{CDCl}_3$

## LC-MS analysis of spirit thinner samples.

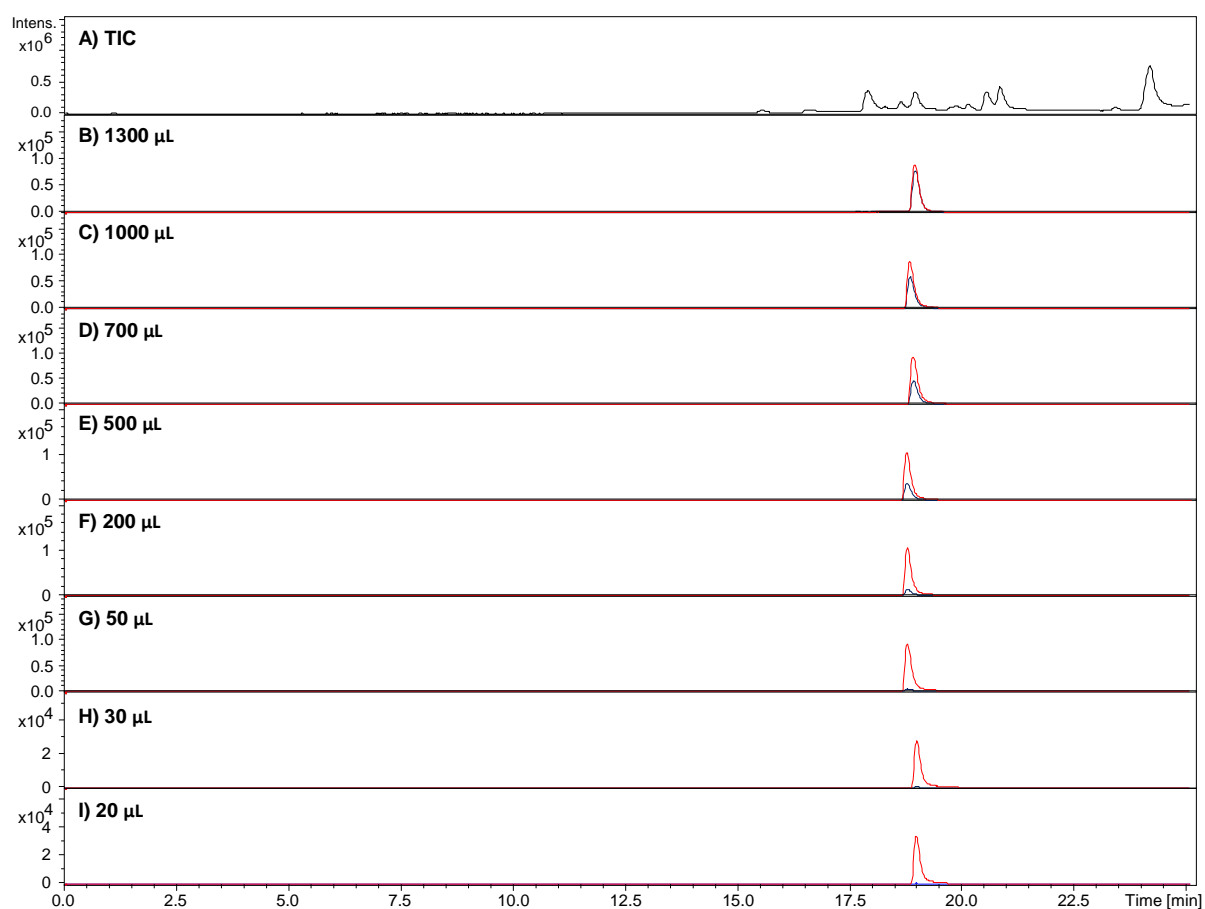

**Fig. S10** Extracted ion chromatograms of denatonium cation (blue line) observed in the sample of spirit thinner and  $\alpha$ -C deuterated denatonium cation (red line) as added standard. Total ion chromatogram is presented at the window A. The following volumes of spirit thinner were used during the experiments: B) 1300  $\mu\text{L}$ ; C) 1000  $\mu\text{L}$ ; D) 700  $\mu\text{L}$ ; E) 500  $\mu\text{L}$ ; F) 200  $\mu\text{L}$ ; G) 50  $\mu\text{L}$ ; H) 30  $\mu\text{L}$ ; I) 20  $\mu\text{L}$

The level of detected denatonium cations in used samples of spirit thinner was determined by the isotopic distribution observed on the ESI-MS according to the spectra of algorithm described by Mirgorodskaya and co-workers [2]. The obtained results are presented below.

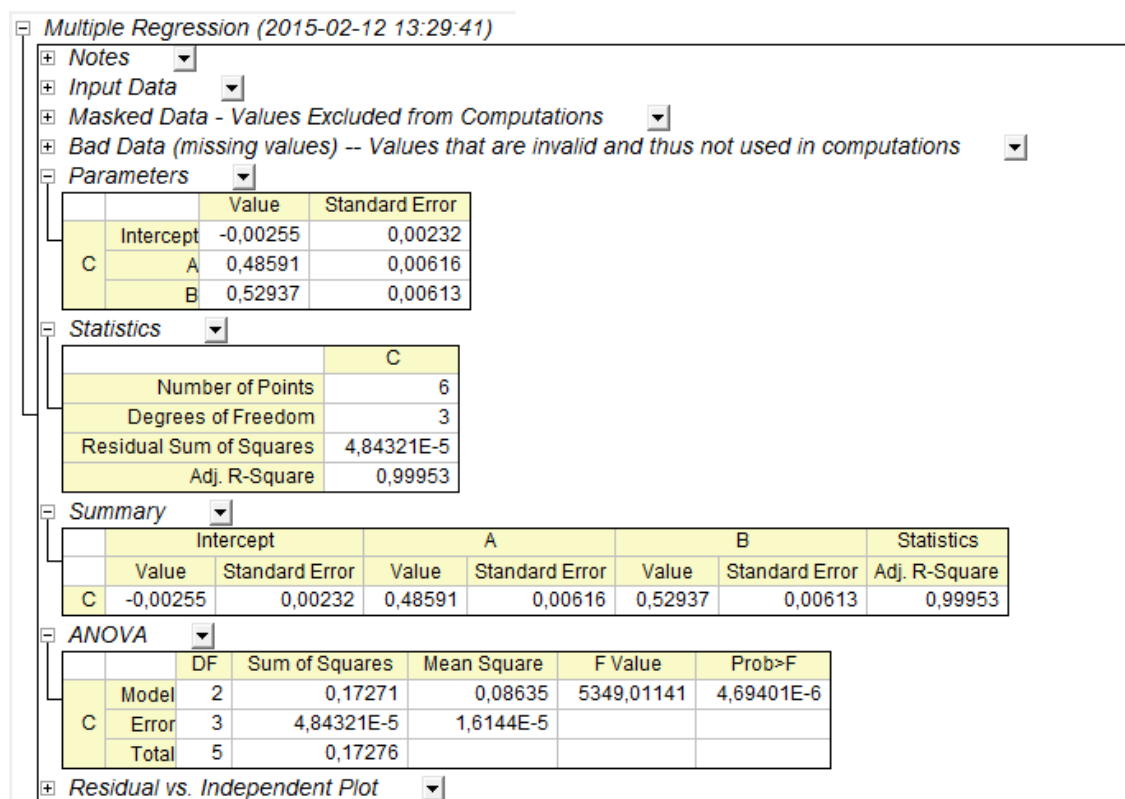

| m/z   | ISOTOPE PATTERN |       |        | NORMALIZED VALUES |          |          | OBTAINED       |         | CALCULATED ISOTOPE PATTERN |           |           |
|-------|-----------------|-------|--------|-------------------|----------|----------|----------------|---------|----------------------------|-----------|-----------|
|       | H               | D     | LC MS  | NH                | ND       | NLC      | PARAMETERS     |         | HA                         | DB        | HA+DB     |
| 325,2 | 27228           | 379   | 68635  | 0,769522          | 0,004113 | 0,374858 | A              | 0,48591 | 0,373918                   | 0,0021772 | 0,3760957 |
| 326,2 | 6546            | 1149  | 16200  | 0,185004          | 0,012469 | 0,088478 | B              | 0,52937 | 0,089895                   | 0,0066006 | 0,096496  |
| 327,2 | 1387            | 71240 | 78020  | 0,0392            | 0,773087 | 0,426115 | R <sup>2</sup> | 0,99953 | 0,019047                   | 0,4092493 | 0,4282967 |
| 328,2 | 222             | 17006 | 17697  | 0,006274          | 0,184547 | 0,096654 |                |         | 0,003049                   | 0,0976936 | 0,1007423 |
| 329,2 | 0               | 2198  | 2313   | 0                 | 0,023852 | 0,012633 |                |         | 0                          | 0,0126268 | 0,0126268 |
| 330,2 | 0               | 178   | 231    | 0                 | 0,001932 | 0,001262 |                |         | 0                          | 0,0010225 | 0,0010225 |
|       | 35383           | 92150 | 183096 |                   |          |          |                |         |                            |           |           |

**Fig. S11** The results of computational analysis of LC-MS analysis of 1300 µL of spirit thinner with added deuterated Bitrex standard

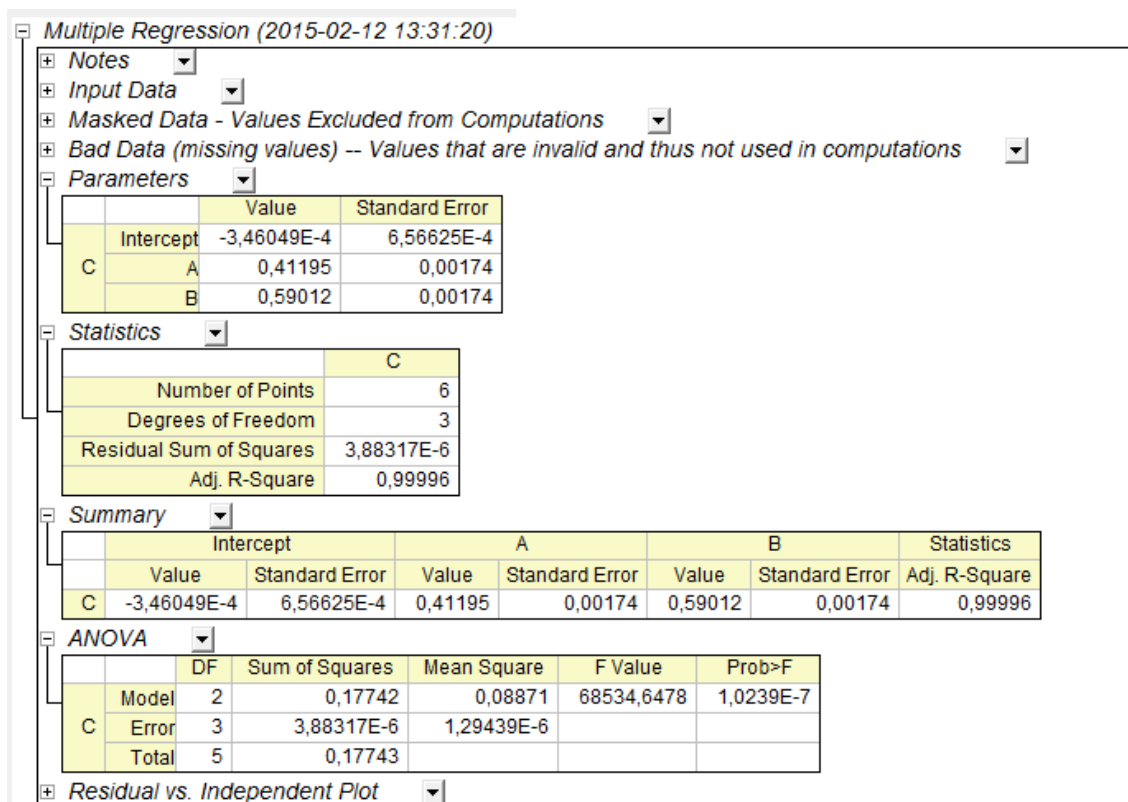

| m/z   | ISOTOPE PATTERN |       |        | NORMALIZED VALUES |          |          | OBTAINED       |         | CALCULATED ISOTOPE PATTERN |           |           |
|-------|-----------------|-------|--------|-------------------|----------|----------|----------------|---------|----------------------------|-----------|-----------|
|       | H               | D     | LC MS  | NH                | ND       | NLC      | PARAMETERS     |         | HA                         | DB        | HA+DB     |
| 325,2 | 27228           | 379   | 39547  | 0,769522          | 0,004113 | 0,318729 | A              | 0,41195 | 0,3170046                  | 0,0024271 | 0,3194317 |
| 326,2 | 6546            | 1149  | 10510  | 0,185004          | 0,012469 | 0,084705 | B              | 0,59012 | 0,0762124                  | 0,0073581 | 0,0835705 |
| 327,2 | 1387            | 71240 | 58579  | 0,0392            | 0,773087 | 0,472118 | R <sup>2</sup> | 0,99996 | 0,0161483                  | 0,4562143 | 0,4723626 |
| 328,2 | 222             | 17006 | 13746  | 0,006274          | 0,184547 | 0,110786 |                |         | 0,0025847                  | 0,1089048 | 0,1114895 |
| 329,2 | 0               | 2198  | 1560   | 0                 | 0,023852 | 0,012573 |                |         | 0                          | 0,0140758 | 0,0140758 |
| 330,2 | 0               | 178   | 135    | 0                 | 0,001932 | 0,001088 |                |         | 0                          | 0,0011399 | 0,0011399 |
|       | 35383           | 92150 | 124077 |                   |          |          |                |         |                            |           |           |

**Fig. S12** The results of computational analysis of LC-MS analysis of 1000  $\mu$ L of spirit thinner with added deuterated Bitrex standard

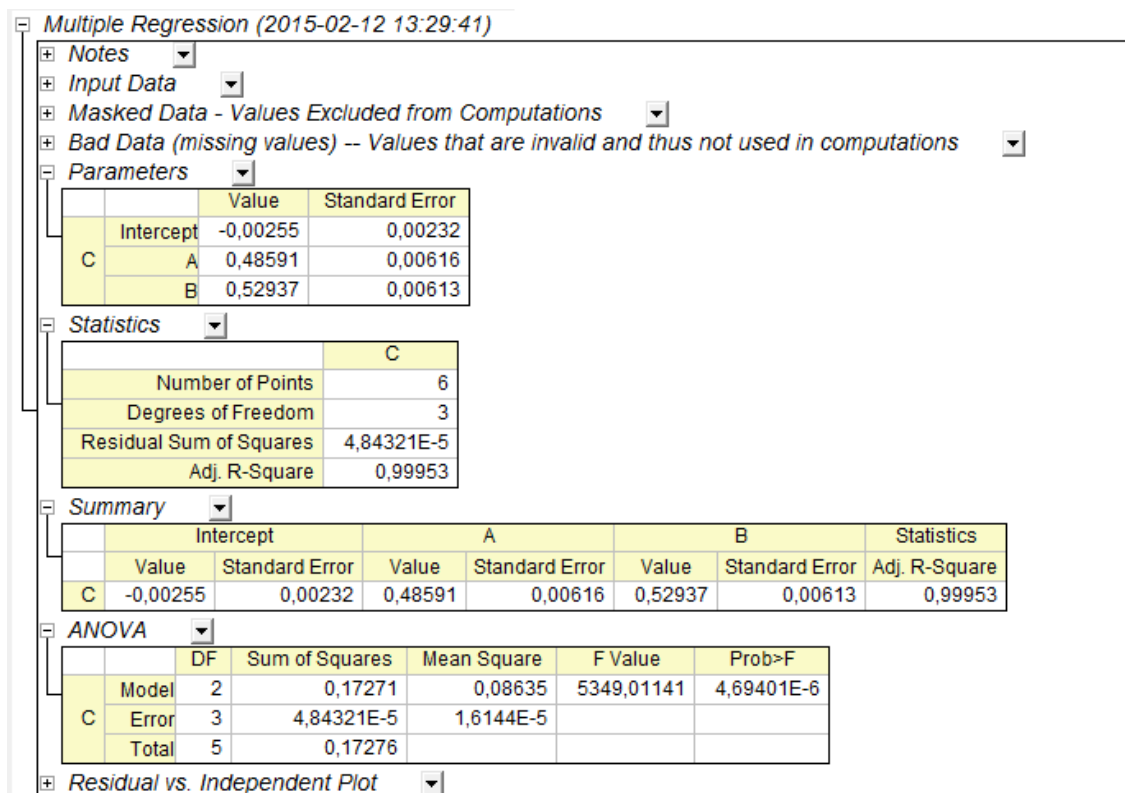

| m/z   | ISOTOPE PATTERN |       |        | NORMALIZED VALUES |          |          | OBTAINED       |         | CALCULATED ISOTOPE PATTERN |           |           |
|-------|-----------------|-------|--------|-------------------|----------|----------|----------------|---------|----------------------------|-----------|-----------|
|       | H               | D     | LC MS  | NH                | ND       | NLC      | PARAMETERS     |         | HA                         | DB        | HA+DB     |
| 325,2 | 27228           | 379   | 36684  | 0,769522          | 0,004113 | 0,259533 | A              | 0,33477 | 0,2576129                  | 0,00279   | 0,2604029 |
| 326,2 | 6546            | 1149  | 8863   | 0,185004          | 0,012469 | 0,062704 | B              | 0,67836 | 0,0619338                  | 0,0084583 | 0,0703922 |
| 327,2 | 1387            | 71240 | 75690  | 0,0392            | 0,773087 | 0,535494 | R <sup>2</sup> | 0,99966 | 0,0131229                  | 0,5244315 | 0,5375544 |
| 328,2 | 222             | 17006 | 17610  | 0,006274          | 0,184547 | 0,124588 |                |         | 0,0021004                  | 0,1251893 | 0,1272897 |
| 329,2 | 0               | 2198  | 2308   | 0                 | 0,023852 | 0,016329 |                |         | 0                          | 0,0161805 | 0,0161805 |
| 330,2 | 0               | 178   | 191    | 0                 | 0,001932 | 0,001351 |                |         | 0                          | 0,0013103 | 0,0013103 |
|       | 35383           | 92150 | 141346 |                   |          |          |                |         |                            |           |           |

**Fig. S13** The results of computational analysis of LC-MS analysis of 700  $\mu$ L of spirit thinner with added deuterated Bitrex standard

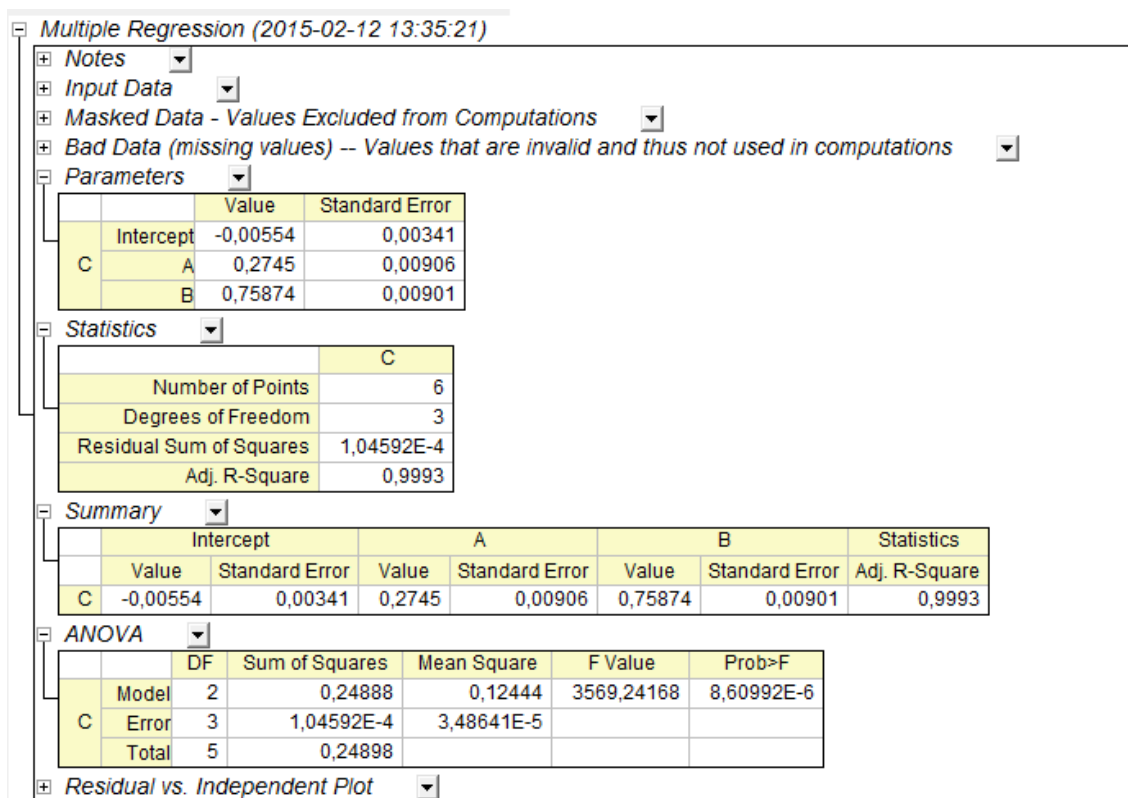

| m/z   | ISOTOPE PATTERN |       |        | NORMALIZED VALUES |          |          | OBTAINED       |         | CALCULATED ISOTOPE PATTERN |           |           |
|-------|-----------------|-------|--------|-------------------|----------|----------|----------------|---------|----------------------------|-----------|-----------|
|       | H               | D     | LC MS  | NH                | ND       | NLC      | PARAMETERS     |         | HA                         | DB        | HA+DB     |
| 325,2 | 27228           | 379   | 28613  | 0,769522          | 0,004113 | 0,209847 | A              | 0,2745  | 0,2112338                  | 0,0031206 | 0,2143544 |
| 326,2 | 6546            | 1149  | 6860   | 0,185004          | 0,012469 | 0,050311 | B              | 0,75874 | 0,0507836                  | 0,0094606 | 0,0602442 |
| 327,2 | 1387            | 71240 | 80902  | 0,0392            | 0,773087 | 0,593332 | R <sup>2</sup> | 0,99956 | 0,0107603                  | 0,5865723 | 0,5973326 |
| 328,2 | 222             | 17006 | 17667  | 0,006274          | 0,184547 | 0,129569 |                |         | 0,0017223                  | 0,1400231 | 0,1417454 |
| 329,2 | 0               | 2198  | 2151   | 0                 | 0,023852 | 0,015775 |                |         | 0                          | 0,0180978 | 0,0180978 |
| 330,2 | 0               | 178   | 159    | 0                 | 0,001932 | 0,001166 |                |         | 0                          | 0,0014656 | 0,0014656 |
|       | 35383           | 92150 | 136352 |                   |          |          |                |         |                            |           |           |

**Fig. S14** The results of computational analysis of LC-MS analysis of 500 µL of spirit thinner with added deuterated Bitrex standard

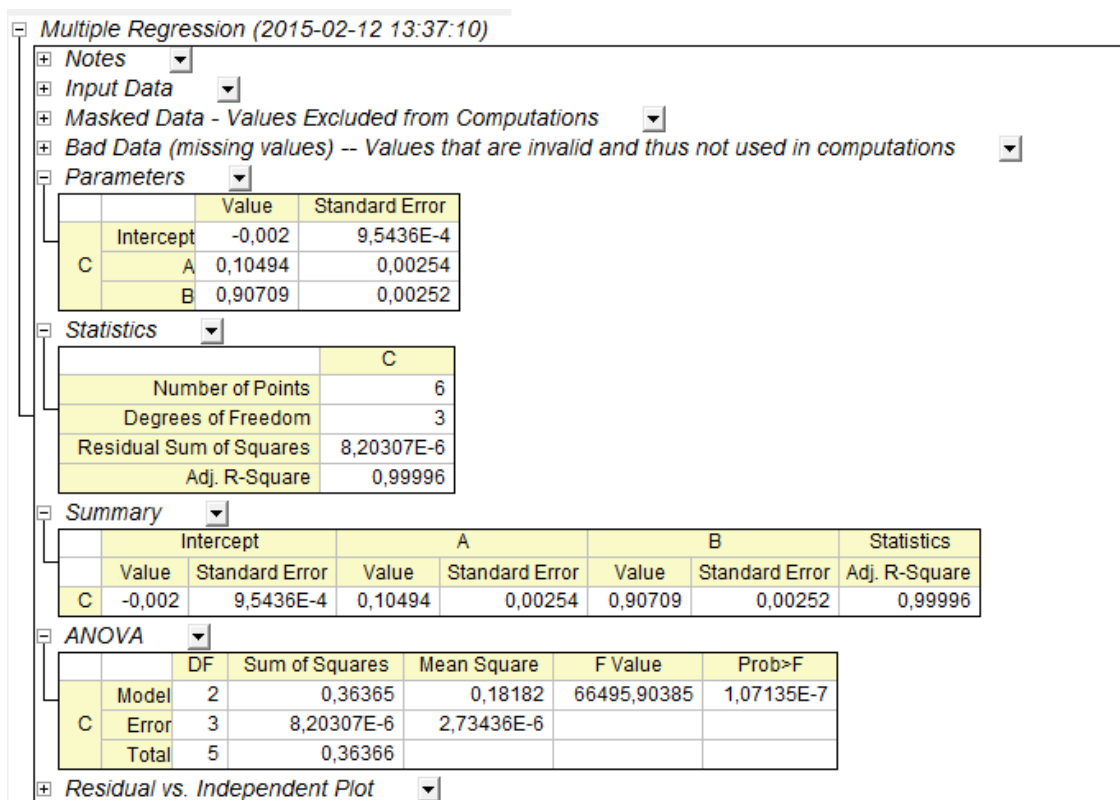

| m/z   | ISOTOPE PATTERN |       |        | NORMALIZED VALUES |          |          | OBTAINED       |         | CALCULATED ISOTOPE PATTERN |           |           |
|-------|-----------------|-------|--------|-------------------|----------|----------|----------------|---------|----------------------------|-----------|-----------|
|       | H               | D     | LC MS  | NH                | ND       | NLC      | PARAMETERS     |         | HA                         | DB        | HA+DB     |
| 325,2 | 27228           | 379   | 9542   | 0,769522          | 0,004113 | 0,082638 | A              | 0,10494 | 0,0807536                  | 0,0037307 | 0,0844844 |
| 326,2 | 6546            | 1149  | 3240   | 0,185004          | 0,012469 | 0,02806  | B              | 0,90709 | 0,0194143                  | 0,0113103 | 0,0307247 |
| 327,2 | 1387            | 71240 | 81204  | 0,0392            | 0,773087 | 0,70326  | R <sup>2</sup> | 0,99996 | 0,0041136                  | 0,7012598 | 0,7053734 |
| 328,2 | 222             | 17006 | 19258  | 0,006274          | 0,184547 | 0,166782 |                |         | 0,0006584                  | 0,1674007 | 0,1680591 |
| 329,2 | 0               | 2198  | 2041   | 0                 | 0,023852 | 0,017676 |                |         | 0                          | 0,0216363 | 0,0216363 |
| 330,2 | 0               | 178   | 183    | 0                 | 0,001932 | 0,001585 |                |         | 0                          | 0,0017522 | 0,0017522 |
|       | 35383           | 92150 | 115468 |                   |          |          |                |         |                            |           |           |

**Fig. S15** The results of computational analysis of LC-MS analysis of 200  $\mu$ L of spirit thinner with added deuterated Bitrex standard



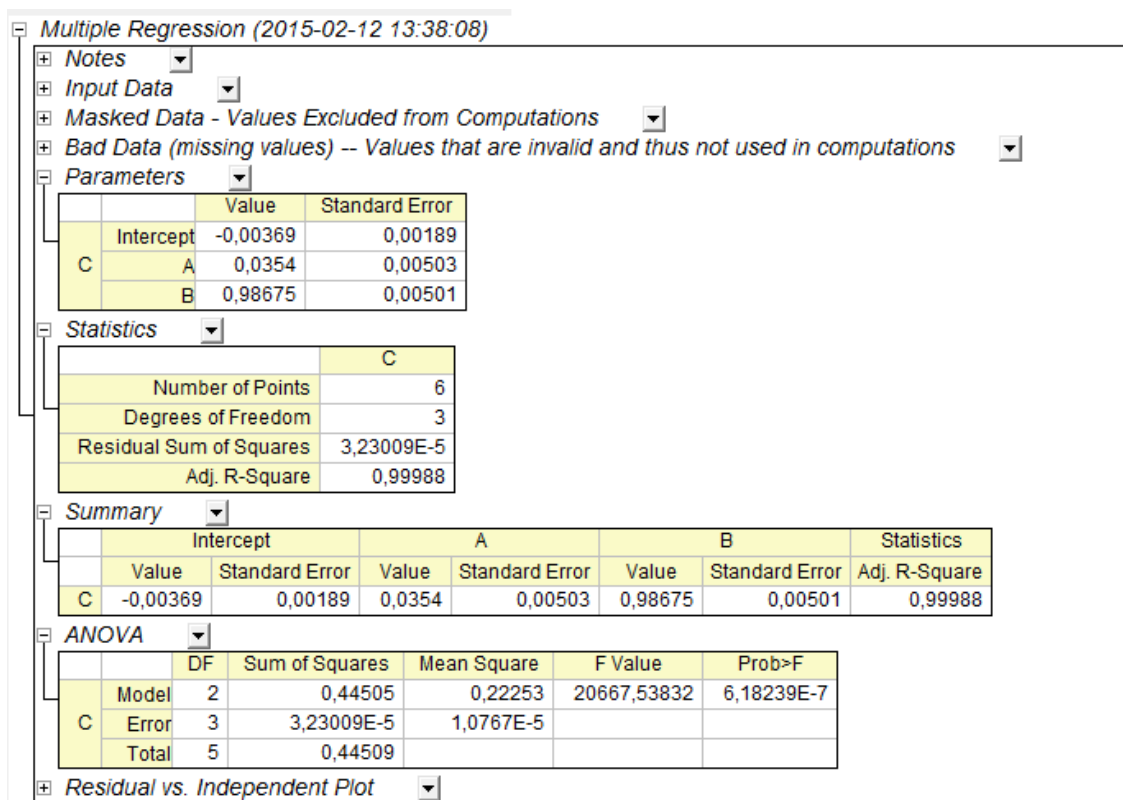

| m/z   | ISOTOPE PATTERN |       |       | NORMALIZED VALUES |          |          | OBTAINED       |         | CALCULATED ISOTOPE PATTERN |           |           |
|-------|-----------------|-------|-------|-------------------|----------|----------|----------------|---------|----------------------------|-----------|-----------|
|       | H               | D     | LC MS | NH                | ND       | NLC      | PARAMETERS     |         | HA                         | DB        | HA+DB     |
| 325,2 | 27228           | 379   | 1289  | 0,769522          | 0,004113 | 0,027368 | A              | 0,0354  | 0,0272411                  | 0,0040584 | 0,0312994 |
| 326,2 | 6546            | 1149  | 758   | 0,185004          | 0,012469 | 0,016094 | B              | 0,98675 | 0,0065491                  | 0,0123036 | 0,0188527 |
| 327,2 | 1387            | 71240 | 35874 | 0,0392            | 0,773087 | 0,761672 | R <sup>2</sup> | 0,99988 | 0,0013877                  | 0,762844  | 0,7642316 |
| 328,2 | 222             | 17006 | 8178  | 0,006274          | 0,184547 | 0,173634 |                |         | 0,0002221                  | 0,1821017 | 0,1823238 |
| 329,2 | 0               | 2198  | 1000  | 0                 | 0,023852 | 0,021232 |                |         | 0                          | 0,0235364 | 0,0235364 |
| 330,2 | 0               | 178   | 0     | 0                 | 0,001932 | 0        |                |         | 0                          | 0,001906  | 0,001906  |
|       | 35383           | 92150 | 47099 |                   |          |          |                |         |                            |           |           |

**Fig. S16** The results of computational analysis of LC-MS analysis of 50 µL of spirit thinner with added deuterated Bitrex standard

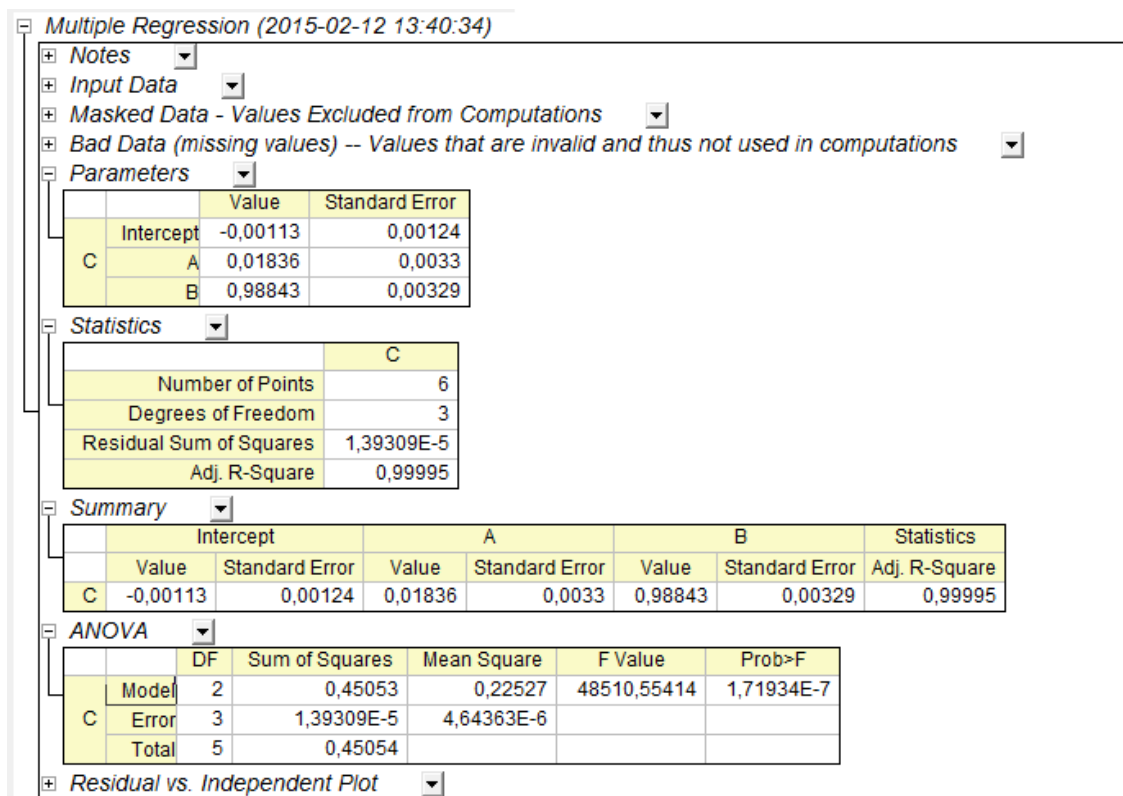

| m/z   | ISOTOPE PATTERN |       |       | NORMALIZED VALUES |          |          | OBTAINED PARAMETERS |         | CALCULATED ISOTOPE PATTERN |           |           |
|-------|-----------------|-------|-------|-------------------|----------|----------|---------------------|---------|----------------------------|-----------|-----------|
|       | H               | D     | LC MS | NH                | ND       | NLC      |                     |         | HA                         | DB        | HA+DB     |
| 325,2 | 27228           | 379   | 378   | 0,769522          | 0,004113 | 0,016384 | A                   | 0,01836 | 0,0141284                  | 0,0040653 | 0,0181937 |
| 326,2 | 6546            | 1149  | 402   | 0,185004          | 0,012469 | 0,017424 | B                   | 0,98843 | 0,0033967                  | 0,0123245 | 0,0157212 |
| 327,2 | 1387            | 71240 | 17616 | 0,0392            | 0,773087 | 0,763556 | R <sup>2</sup>      | 0,99995 | 0,0007197                  | 0,7641427 | 0,7648624 |
| 328,2 | 222             | 17006 | 4204  | 0,006274          | 0,184547 | 0,18222  |                     |         | 0,0001152                  | 0,1824117 | 0,1825269 |
| 329,2 | 0               | 2198  | 471   | 0                 | 0,023852 | 0,020415 |                     |         | 0                          | 0,0235764 | 0,0235764 |
| 330,2 | 0               | 178   | 0     | 0                 | 0,001932 | 0        |                     |         | 0                          | 0,0019093 | 0,0019093 |
|       | 35383           | 92150 | 23071 |                   |          |          |                     |         |                            |           |           |

**Fig. S17** The results of computational analysis of LC-MS analysis of 30 µL of spirit thinner with added deuterated Bitrex standard

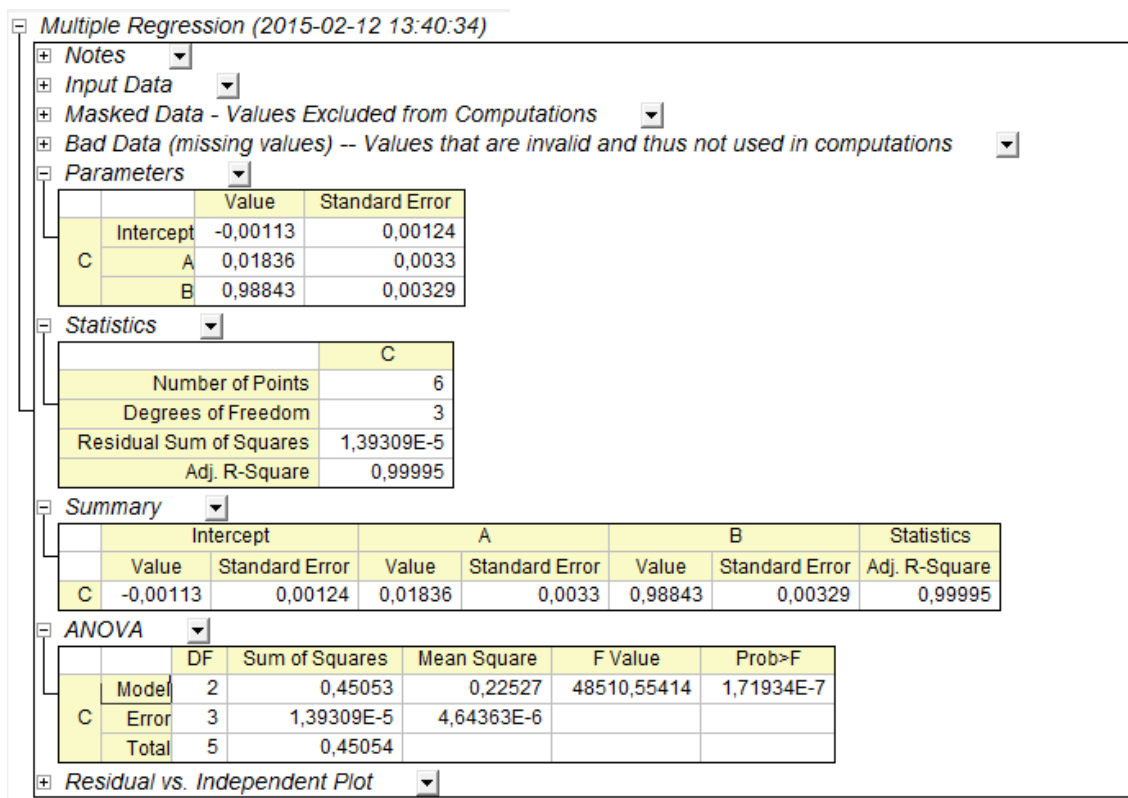

| m/z   | ISOTOPE PATTERN |       |       | NORMALIZED VALUES |          |          | OBTAINED       |         | CALCULATED ISOTOPE PATTERN |          |           |
|-------|-----------------|-------|-------|-------------------|----------|----------|----------------|---------|----------------------------|----------|-----------|
|       | H               | D     | LC MS | NH                | ND       | NLC      | PARAMETERS     |         | HA                         | DB       | HA+DB     |
| 325,2 | 27228           | 379   | 363   | 0,769522          | 0,004113 | 0,010609 | A              | 0,01315 | 0,010119215                | 0,004119 | 0,0142387 |
| 326,2 | 6546            | 1149  | 591   | 0,185004          | 0,012469 | 0,017273 | B              | 1,0016  | 0,002432804                | 0,012489 | 0,0149216 |
| 327,2 | 1387            | 71240 | 26461 | 0,0392            | 0,773087 | 0,773352 | R <sup>2</sup> | 0,99984 | 0,000515475                | 0,774324 | 0,7748398 |
| 328,2 | 222             | 17006 | 6098  | 0,006274          | 0,184547 | 0,178221 |                |         | 8,25057E-05                | 0,184842 | 0,1849247 |
| 329,2 | 0               | 2198  | 703   | 0                 | 0,023852 | 0,020546 |                |         | 0                          | 0,023891 | 0,0238906 |
| 330,2 | 0               | 178   | 0     | 0                 | 0,001932 | 0        |                |         | 0                          | 0,001935 | 0,0019347 |
|       | 35383           | 92150 | 34216 |                   |          |          |                |         |                            |          |           |

**Fig. S18** The results of computational analysis of LC-MS analysis of 20 µL of spirit thinner with added deuterated Bitrex standard

To match the analyte concentration in the sample we prepared the solution of denatonium benzoate in the ethanol with concentration 0.8 mg/mL. Then sample was evaporated under nitrogen stream and dissolved in 1mL of water. To the 20, 30 and 40 $\mu$ L of this solution 20  $\mu$ L of the stock solution of deuterated denatonium benzoate standard (concentration 1 mg/mL) were added followed by the addition of 200  $\mu$ L of water. The quantification of denatonium benzoate was performed by LC-MS analysis. The obtained results (presented below) are in agreement with the theoretical amount of denatonium benzoate used for the denaturation of ethanol sample. The obtained results are presented below.

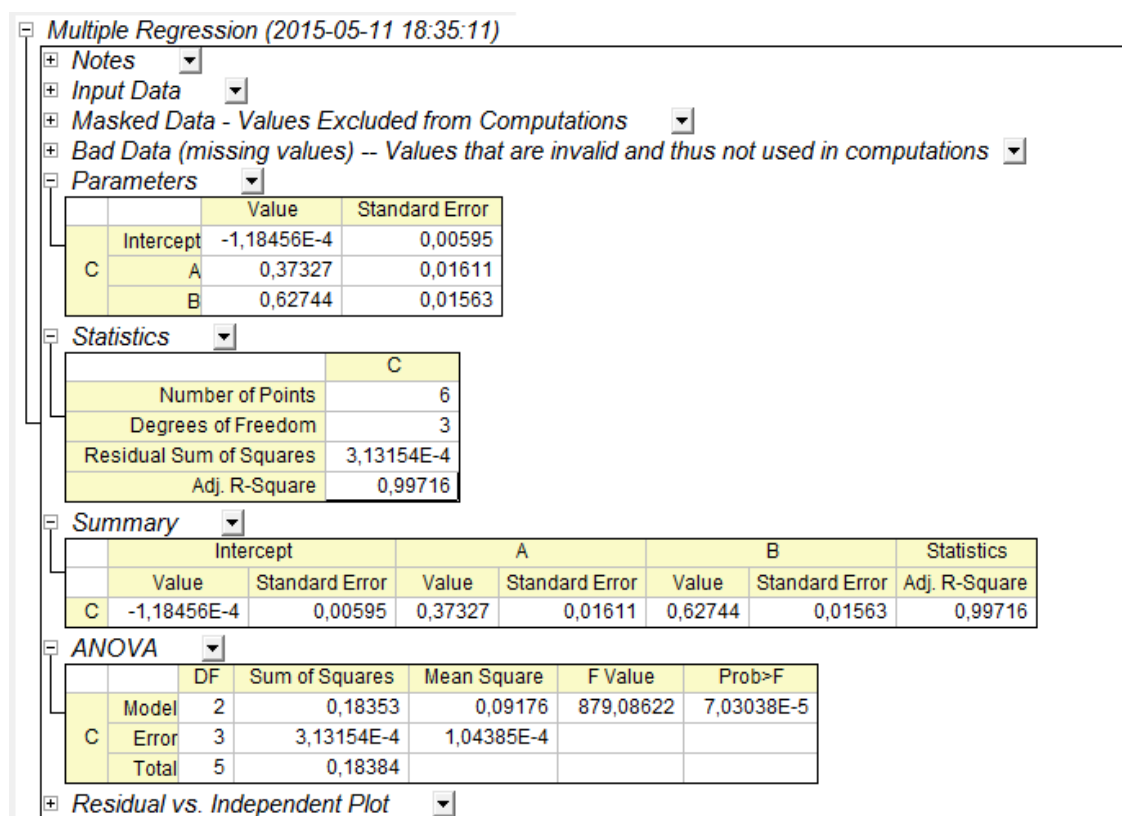

| m/z   | ISOTOPE PATTERN |       |        | NORMALIZED VALUES |          |          | OBTAINED       |         | CALCULATED ISOTOPE PATTERN |           |          |
|-------|-----------------|-------|--------|-------------------|----------|----------|----------------|---------|----------------------------|-----------|----------|
|       | H               | D     | LC MS  | NH                | ND       | NLC      | PARAMETERS     |         | HA                         | DB        | HA+DB    |
| 325,2 | 27228           | 379   | 67518  | 0,755444          | 0,004113 | 0,285892 | A              | 0,37327 | 0,2819844                  | 0,0025806 | 0,284565 |
| 326,2 | 6546            | 1149  | 16557  | 0,181619          | 0,012469 | 0,070107 | B              | 0,62744 | 0,0677931                  | 0,0078234 | 0,075617 |
| 327,2 | 1387            | 71240 | 117106 | 0,038482          | 0,773087 | 0,495863 | R <sup>2</sup> | 0,99716 | 0,0143643                  | 0,4850659 | 0,49943  |
| 328,2 | 222             | 17006 | 31499  | 0,006159          | 0,184547 | 0,133377 |                |         | 0,0022991                  | 0,1157921 | 0,118091 |
| 329,2 | 329,2           | 2198  | 3220   | 0,009134          | 0,023852 | 0,013634 |                |         | 0,0034093                  | 0,014966  | 0,018375 |
| 330,2 | 330,2           | 178   | 266    | 0,009161          | 0,001932 | 0,001126 |                |         | 0,0034197                  | 0,001212  | 0,004632 |
|       | 36042,4         | 92150 | 236166 |                   |          |          |                |         |                            |           |          |

**Fig. S19** The results of computational analysis of LC-MS analysis of 20  $\mu$ L of denaturated spirit thinner with added deuterated denatonium benzoate standard

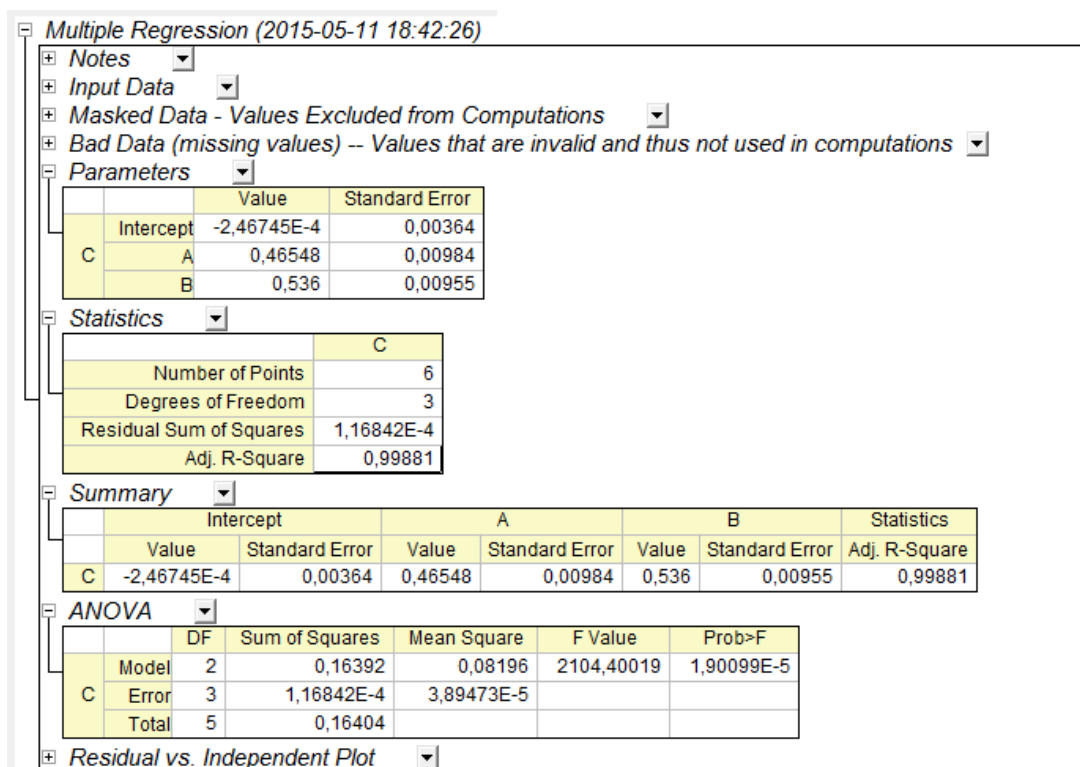

| m/z   | ISOTOPE PATTERN |       |        | NORMALIZED VALUES |          |          | OBTAINED       |         | CALCULATED ISOTOPE PATTERN |           |          |
|-------|-----------------|-------|--------|-------------------|----------|----------|----------------|---------|----------------------------|-----------|----------|
|       | H               | D     | LC MS  | NH                | ND       | NLC      | PARAMETERS     |         | HA                         | DB        | HA+DB    |
| 325,2 | 27228           | 379   | 130131 | 0,755444          | 0,004113 | 0,353386 | A              | 0,46548 | 0,3516439                  | 0,0022045 | 0,353848 |
| 326,2 | 6546            | 1149  | 34024  | 0,181619          | 0,012469 | 0,092396 | B              | 0,536   | 0,0845402                  | 0,0066833 | 0,091223 |
| 327,2 | 1387            | 71240 | 158361 | 0,038482          | 0,773087 | 0,430048 | R <sup>2</sup> | 0,99881 | 0,0179128                  | 0,4143748 | 0,432288 |
| 328,2 | 222             | 17006 | 40648  | 0,006159          | 0,184547 | 0,110385 |                |         | 0,0028671                  | 0,0989172 | 0,101784 |
| 329,2 | 329,2           | 2198  | 4629   | 0,009134          | 0,023852 | 0,012571 |                |         | 0,0042515                  | 0,0127849 | 0,017036 |
| 330,2 | 330,2           | 178   | 447    | 0,009161          | 0,001932 | 0,001214 |                |         | 0,0042645                  | 0,0010354 | 0,0053   |
|       | 36042,4         | 92150 | 368240 |                   |          |          |                |         |                            |           |          |

**Fig. S20** The results of computational analysis of LC-MS analysis of 30 µL of denaturated spirit thinner with added deuterated denatonium benzoate standard

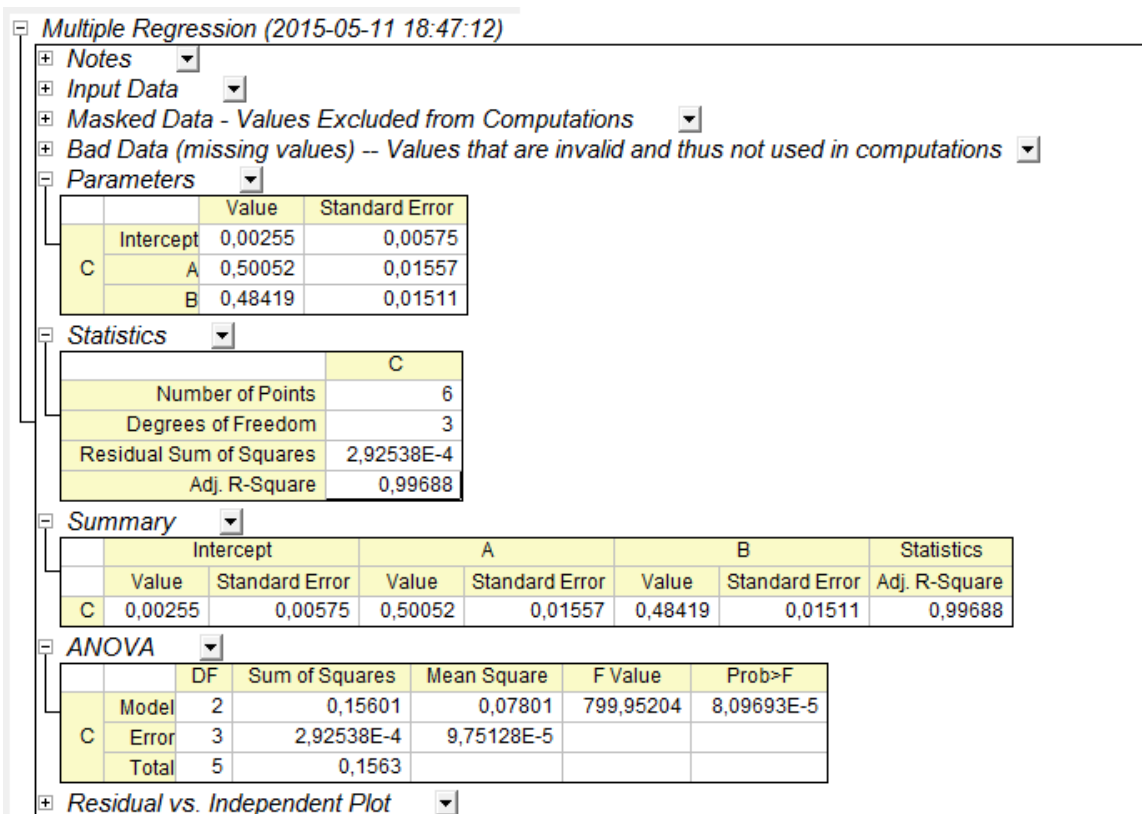

| m/z   | ISOTOPE PATTERN |       |        | NORMALIZED VALUES |          |          | OBTAINED       |         | CALCULATED ISOTOPE PATTERN |          |           |
|-------|-----------------|-------|--------|-------------------|----------|----------|----------------|---------|----------------------------|----------|-----------|
|       | H               | D     | LC MS  | NH                | ND       | NLC      | PARAMETERS     |         | HA                         | DB       | HA+DB     |
| 325,2 | 27228           | 379   | 154172 | 0,755444          | 0,004113 | 0,381099 | A              | 0,50052 | 0,378115                   | 0,001991 | 0,380106  |
| 326,2 | 6546            | 1149  | 43223  | 0,181619          | 0,012469 | 0,106843 | B              | 0,48419 | 0,090904                   | 0,006037 | 0,0969414 |
| 327,2 | 1387            | 71240 | 159228 | 0,038482          | 0,773087 | 0,393597 | R <sup>2</sup> | 0,99688 | 0,019261                   | 0,374321 | 0,3935824 |
| 328,2 | 222             | 17006 | 42952  | 0,006159          | 0,184547 | 0,106173 |                |         | 0,003083                   | 0,089356 | 0,0924387 |
| 329,2 | 329,2           | 2198  | 4546   | 0,009134          | 0,023852 | 0,011237 |                |         | 0,004572                   | 0,011549 | 0,0161207 |
| 330,2 | 330,2           | 178   | 425    | 0,009161          | 0,001932 | 0,001051 |                |         | 0,004585                   | 0,000935 | 0,0055208 |
|       | 36042,4         | 92150 | 404546 |                   |          |          |                |         |                            |          |           |

**Fig. S21** The results of computational analysis of LC-MS analysis of 40  $\mu$ L of denaturated spirit thinner with added deuterated denatonium benzoate standard

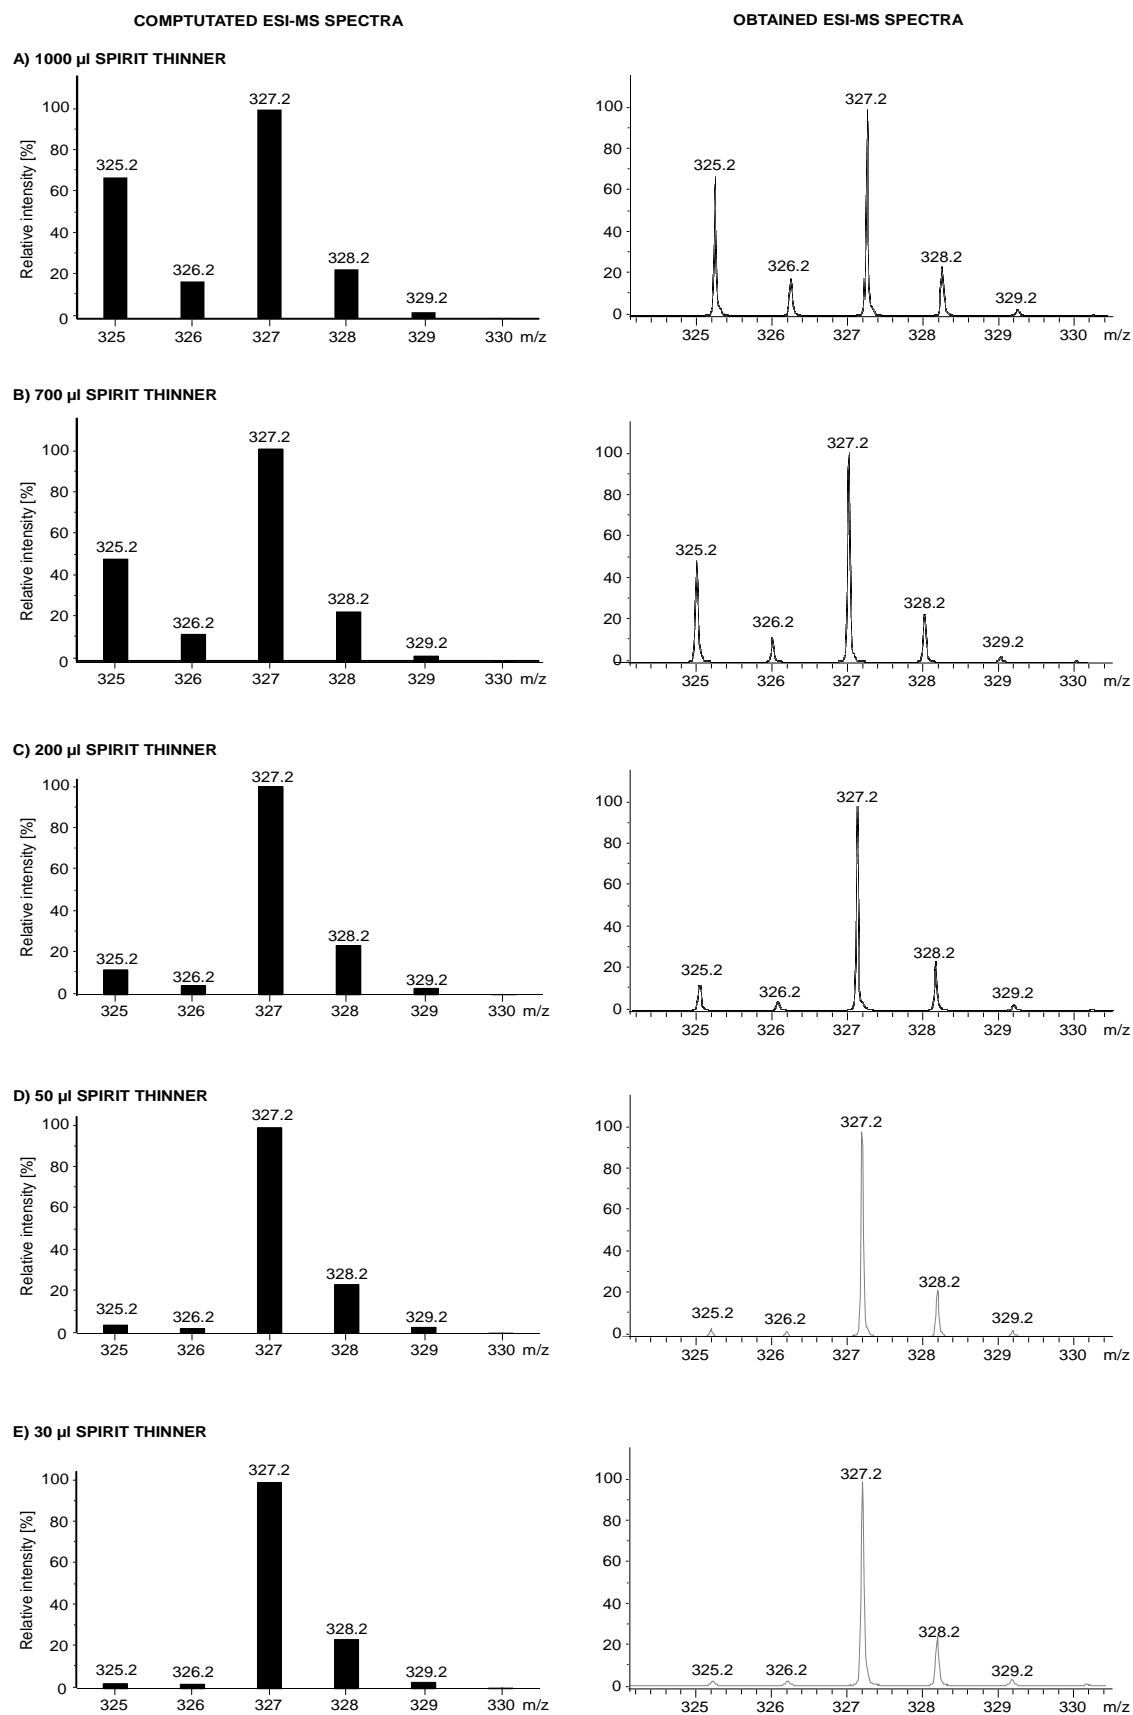

**Fig. S22** Calculated and obtained isotopic patterns for LC-MS analysis of following volumes of spirit thinner: A) 1000 $\mu$ L; B) 700  $\mu$ L; C) 200  $\mu$ L; D) 50  $\mu$ L; E) 30  $\mu$ L

The experimental isotopic patterns for analyzed sample were compared with those obtained according to the computational procedure. The results obtained for the analysis of 1300, 500 and 20  $\mu\text{L}$  of alcoholic thinner are presented below (Fig. 4A-C). Other spectra are presented in supplementary data (Fig. 23S). The same results were obtained when deuterated denatonium benzoate standard for quantitative analysis was directly added to the analyze sample (experiment not shown in experimental section).

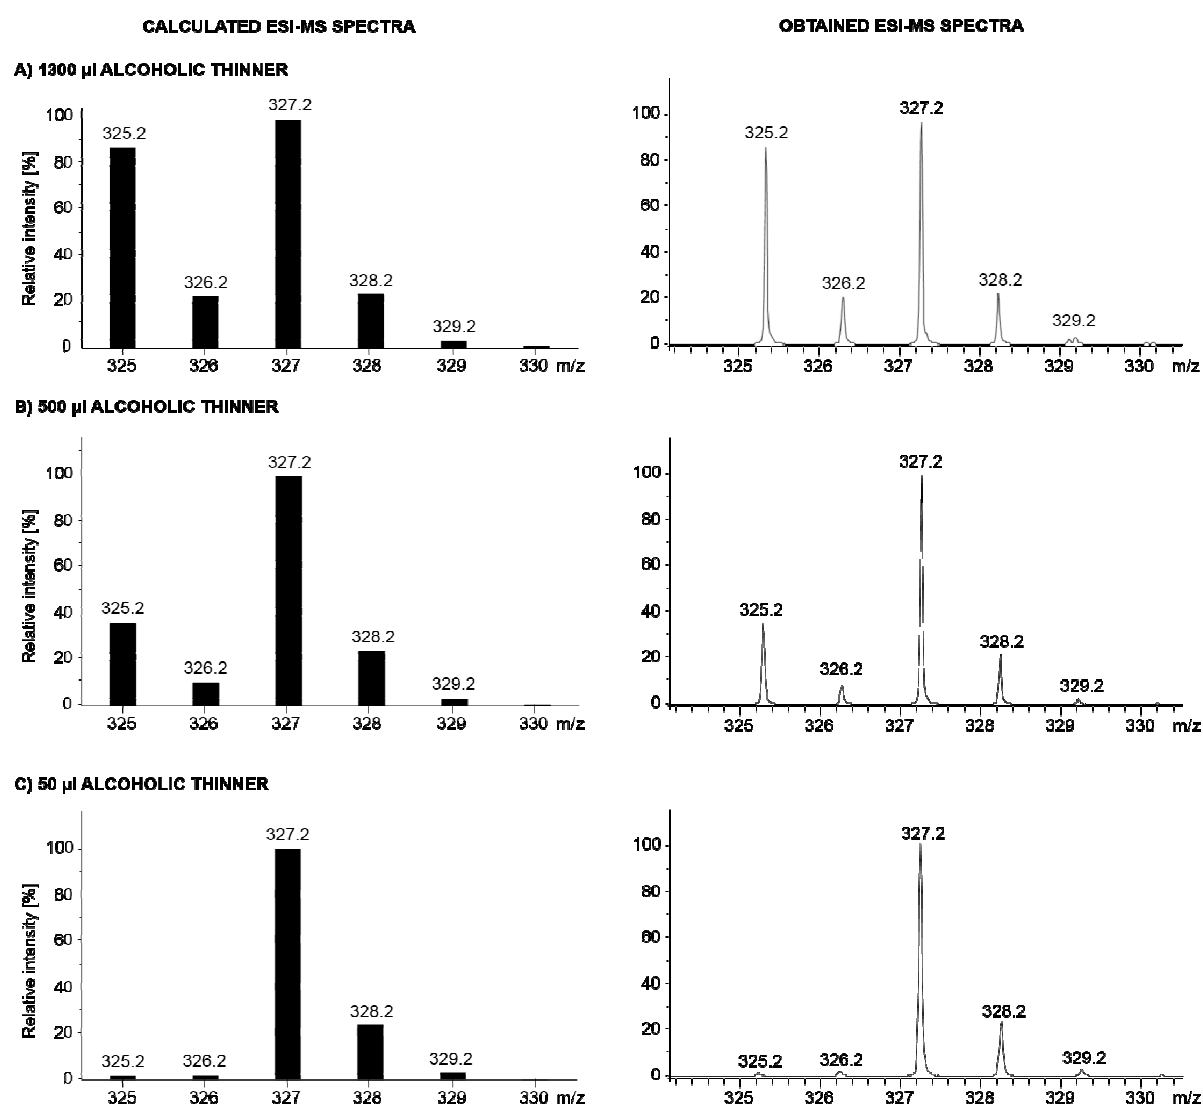

**Fig. S23** Calculated and experimental isotopic distributions obtained after LC-MS analysis of denatonium cation in alcoholic thinner samples A) 1300  $\mu\text{L}$ ; B) 500  $\mu\text{L}$  and C) 50  $\mu\text{L}$ , containing deuterated denatonium benzoate standard



To the samples of 200, 500, 700 and 1000 $\mu$ L the deuterated isotopologue of denatonium benzoate was added (20  $\mu$ l of the standard solution containing 1mg/mL of denatonium benzoate) and the samples were evaporated under nitrogen stream. The used volumes of deuterated standard (20  $\mu$ L) do not lead to the pipetting volume errors like in the case of addition of 2  $\mu$ L. The obtained results were reproducible and comparable with those obtained by us previously. Such analysis revealed the applicability of the proposed methodology in the quantitative analysis of denatonium benzoate.

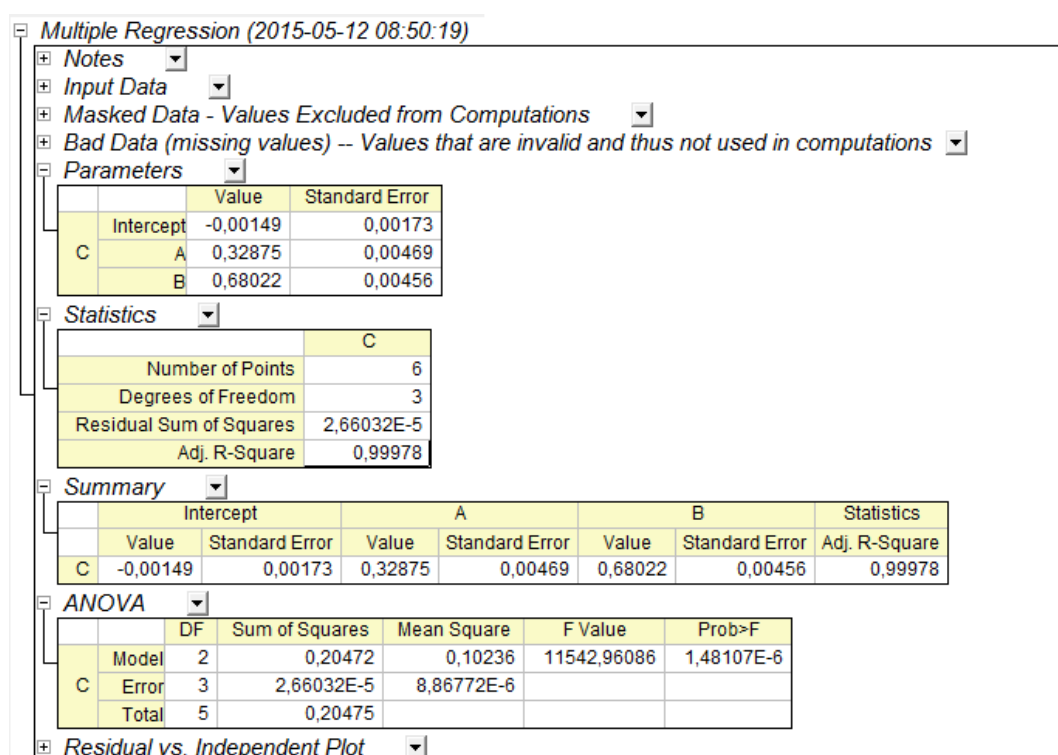

| m/z   | ISOTOPE PATTERN |       |        | NORMALIZED VALUES |          |          | OBTAINED       |         | CALCULATED ISOTOPE PATTERN |          |           |
|-------|-----------------|-------|--------|-------------------|----------|----------|----------------|---------|----------------------------|----------|-----------|
|       | H               | D     | LC MS  | NH                | ND       | NLC      | PARAMETERS     |         | HA                         | DB       | HA+DB     |
| 325,2 | 27228           | 379   | 109297 | 0,755444          | 0,004113 | 0,249688 | A              | 0,32875 | 0,2483521                  | 0,002798 | 0,2511497 |
| 326,2 | 6546            | 1149  | 29237  | 0,181619          | 0,012469 | 0,066792 | B              | 0,68022 | 0,0597074                  | 0,008482 | 0,0681889 |
| 327,2 | 1387            | 71240 | 234646 | 0,038482          | 0,773087 | 0,536046 | R <sup>2</sup> | 0,99978 | 0,0126511                  | 0,525869 | 0,5385206 |
| 328,2 | 222             | 17006 | 57100  | 0,006159          | 0,184547 | 0,130444 |                |         | 0,0020249                  | 0,125533 | 0,1275574 |
| 329,2 | 329,2           | 2198  | 6853   | 0,009134          | 0,023852 | 0,015656 |                |         | 0,0030027                  | 0,016225 | 0,0192276 |
| 330,2 | 330,2           | 178   | 602    | 0,009161          | 0,001932 | 0,001375 |                |         | 0,0030118                  | 0,001314 | 0,0043258 |
|       | 36042,4         | 92150 | 437735 |                   |          |          |                |         |                            |          |           |

**Fig. S24** The results of computational analysis of LC-MS analysis of 1000  $\mu$ L of spirit thinner with added deuterated denatonium benzoate standard

Multiple Regression (2015-05-12 08:58:39)

- Notes
- Input Data
- Masked Data - Values Excluded from Computations
- Bad Data (missing values) -- Values that are invalid and thus not used in computations
- Parameters
 

|   |           | Value   | Standard Error |
|---|-----------|---------|----------------|
| C | Intercept | 0,00413 | 0,01009        |
|   | A         | 0,26621 | 0,02731        |
|   | B         | 0,709   | 0,0265         |
- Statistics
 

|                         | C          |
|-------------------------|------------|
| Number of Points        | 6          |
| Degrees of Freedom      | 3          |
| Residual Sum of Squares | 9,00133E-4 |
| Adj. R-Square           | 0,99309    |
- Summary
 

|   | Intercept |                | A       |                | B     |                | Statistics    |
|---|-----------|----------------|---------|----------------|-------|----------------|---------------|
|   | Value     | Standard Error | Value   | Standard Error | Value | Standard Error | Adj. R-Square |
| C | 0,00413   | 0,01009        | 0,26621 | 0,02731        | 0,709 | 0,0265         | 0,99309       |
- ANOVA
 

|   |       | DF | Sum of Squares | Mean Square | F Value   | Prob>F     |
|---|-------|----|----------------|-------------|-----------|------------|
| C | Model | 2  | 0,2161         | 0,10805     | 360,11807 | 2,67154E-4 |
|   | Error | 3  | 9,00133E-4     | 3,00044E-4  |           |            |
|   | Total | 5  | 0,217          |             |           |            |
- Residual vs. Independent Plot

| m/z   | ISOTOPE PATTERN |       |        | NORMALIZED VALUES |          |          | OBTAINED       |         | CALCULATED ISOTOPE PATTERN |          |          |
|-------|-----------------|-------|--------|-------------------|----------|----------|----------------|---------|----------------------------|----------|----------|
|       | H               | D     | LC MS  | NH                | ND       | NLC      | PARAMETERS     |         | HA                         | DB       | HA+DB    |
| 325,2 | 27228           | 379   | 88901  | 0,755444          | 0,004113 | 0,210682 | A              | 0,26621 | 0,201107                   | 0,002916 | 0,204023 |
| 326,2 | 6546            | 1149  | 21867  | 0,181619          | 0,012469 | 0,051822 | B              | 0,709   | 0,048349                   | 0,00884  | 0,057189 |
| 327,2 | 1387            | 71240 | 234879 | 0,038482          | 0,773087 | 0,556629 | R <sup>2</sup> | 0,99309 | 0,010244                   | 0,548119 | 0,558363 |
| 328,2 | 222             | 17006 | 68660  | 0,006159          | 0,184547 | 0,162714 |                |         | 0,00164                    | 0,130844 | 0,132483 |
| 329,2 | 329,2           | 2198  | 7107   | 0,009134          | 0,023852 | 0,016843 |                |         | 0,002431                   | 0,016911 | 0,019343 |
| 330,2 | 330,2           | 178   | 553    | 0,009161          | 0,001932 | 0,001311 |                |         | 0,002439                   | 0,00137  | 0,003808 |
|       | 36042,4         | 92150 | 421967 |                   |          |          |                |         |                            |          |          |

**Fig. S25** The results of computational analysis of LC-MS analysis of 700 µL of spirit thinner with added deuterated denatonium benzoate standard

Multiple Regression (2015-05-12 09:04:01)

Notes

Input Data

Masked Data - Values Excluded from Computations

Bad Data (missing values) -- Values that are invalid and thus not used in computations

Parameters

|   |           | Value    | Standard Error |
|---|-----------|----------|----------------|
| C | Intercept | -0,00274 | 0,00341        |
|   | A         | 0,1762   | 0,00923        |
|   | B         | 0,84021  | 0,00896        |

Statistics

|                         | C          |
|-------------------------|------------|
| Number of Points        | 6          |
| Degrees of Freedom      | 3          |
| Residual Sum of Squares | 1,02825E-4 |
| Adj. R-Square           | 0,99944    |

Summary

|   | Intercept |                | A      |                | B       |                | Statistics    |
|---|-----------|----------------|--------|----------------|---------|----------------|---------------|
|   | Value     | Standard Error | Value  | Standard Error | Value   | Standard Error | Adj. R-Square |
| C | -0,00274  | 0,00341        | 0,1762 | 0,00923        | 0,84021 | 0,00896        | 0,99944       |

ANOVA

|   |       | DF | Sum of Squares | Mean Square | F Value    | Prob>F    |
|---|-------|----|----------------|-------------|------------|-----------|
| C | Model | 2  | 0,30391        | 0,15195     | 4433,39939 | 6,2203E-6 |
|   | Error | 3  | 1,02825E-4     | 3,42749E-5  |            |           |
|   | Total | 5  | 0,30401        |             |            |           |

Residual vs. Independent Plot

| m/z   | ISOTOPE PATTERN |       |        | NORMALIZED VALUES |          |          | OBTAINED       |         | CALCULATED ISOTOPE PATTERN |          |          |
|-------|-----------------|-------|--------|-------------------|----------|----------|----------------|---------|----------------------------|----------|----------|
|       | H               | D     | LC MS  | NH                | ND       | NLC      | PARAMETERS     |         | HA                         | DB       | HA+DB    |
| 325,2 | 27228           | 379   | 50432  | 0,755444          | 0,004113 | 0,13538  | A              | 0,1762  | 0,133109                   | 0,003456 | 0,136565 |
| 326,2 | 6546            | 1149  | 12460  | 0,181619          | 0,012469 | 0,033448 | B              | 0,84021 | 0,032001                   | 0,010476 | 0,042478 |
| 327,2 | 1387            | 71240 | 242880 | 0,038482          | 0,773087 | 0,651988 | R <sup>2</sup> | 0,99944 | 0,006781                   | 0,649556 | 0,656336 |
| 328,2 | 222             | 17006 | 59892  | 0,006159          | 0,184547 | 0,160774 |                |         | 0,001085                   | 0,155058 | 0,156143 |
| 329,2 | 329,2           | 2198  | 6371   | 0,009134          | 0,023852 | 0,017102 |                |         | 0,001609                   | 0,020041 | 0,02165  |
| 330,2 | 330,2           | 178   | 487    | 0,009161          | 0,001932 | 0,001307 |                |         | 0,001614                   | 0,001623 | 0,003237 |
|       | 36042,4         | 92150 | 372522 |                   |          |          |                |         |                            |          |          |

**Fig.S26** The results of computational analysis of LC-MS analysis of 500 µL of spirit thinner with added deuterated denatonium benzoate standard

Multiple Regression (2015-05-12 09:07:53)

Notes

Input Data

Masked Data - Values Excluded from Computations

Bad Data (missing values) -- Values that are invalid and thus not used in computations

Parameters

|   |           | Value   | Standard Error |
|---|-----------|---------|----------------|
| C | Intercept | 0,00317 | 0,00904        |
|   | A         | 0,07642 | 0,02448        |
|   | B         | 0,90455 | 0,02375        |

Statistics

|                         | C          |
|-------------------------|------------|
| Number of Points        | 6          |
| Degrees of Freedom      | 3          |
| Residual Sum of Squares | 7,23118E-4 |
| Adj. R-Square           | 0,99671    |

Summary

|   | Intercept |                | A       |                | B       |                | Statistics    |
|---|-----------|----------------|---------|----------------|---------|----------------|---------------|
|   | Value     | Standard Error | Value   | Standard Error | Value   | Standard Error | Adj. R-Square |
| C | 0,00317   | 0,00904        | 0,07642 | 0,02448        | 0,90455 | 0,02375        | 0,99671       |

ANOVA

|   |       | DF | Sum of Squares | Mean Square | F Value   | Prob>F     |
|---|-------|----|----------------|-------------|-----------|------------|
| C | Model | 2  | 0,36569        | 0,18284     | 758,56443 | 8,76721E-5 |
|   | Error | 3  | 7,23118E-4     | 2,41039E-4  |           |            |
|   | Total | 5  | 0,36641        |             |           |            |

Residual vs. Independent Plot

| m/z   | ISOTOPE PATTERN |       |        | NORMALIZED VALUES |          |          | OBTAINED       |         | CALCULATED ISOTOPE PATTERN |           |           |
|-------|-----------------|-------|--------|-------------------|----------|----------|----------------|---------|----------------------------|-----------|-----------|
|       | H               | D     | LC MS  | NH                | ND       | NLC      | PARAMETERS     |         | HA                         | DB        | HA+DB     |
| 325,2 | 27228           | 379   | 50348  | 0,755444          | 0,004113 | 0,067619 | A              | 0,07642 | 0,057731                   | 0,0037203 | 0,0614513 |
| 326,2 | 6546            | 1149  | 12376  | 0,181619          | 0,012469 | 0,016621 | B              | 0,90455 | 0,013879                   | 0,0112787 | 0,025158  |
| 327,2 | 1387            | 71240 | 521464 | 0,038482          | 0,773087 | 0,700342 | R <sup>2</sup> | 0,99671 | 0,002941                   | 0,6992962 | 0,702237  |
| 328,2 | 222             | 17006 | 143852 | 0,006159          | 0,184547 | 0,193198 |                |         | 0,000471                   | 0,1669319 | 0,1674026 |
| 329,2 | 329,2           | 2198  | 15295  | 0,009134          | 0,023852 | 0,020542 |                |         | 0,000698                   | 0,0215757 | 0,0222737 |
| 330,2 | 330,2           | 178   | 1250   | 0,009161          | 0,001932 | 0,001679 |                |         | 0,0007                     | 0,0017473 | 0,0024474 |
|       | 36042,4         | 92150 | 744585 |                   |          |          |                |         |                            |           |           |

**Fig. S27** The results of computational analysis of LC-MS analysis of 200  $\mu$ L of spirit thinner with added deuterated denatonium benzoate standard

The LC-MS analysis of commercially available winter/summer windscreen washer fluids.

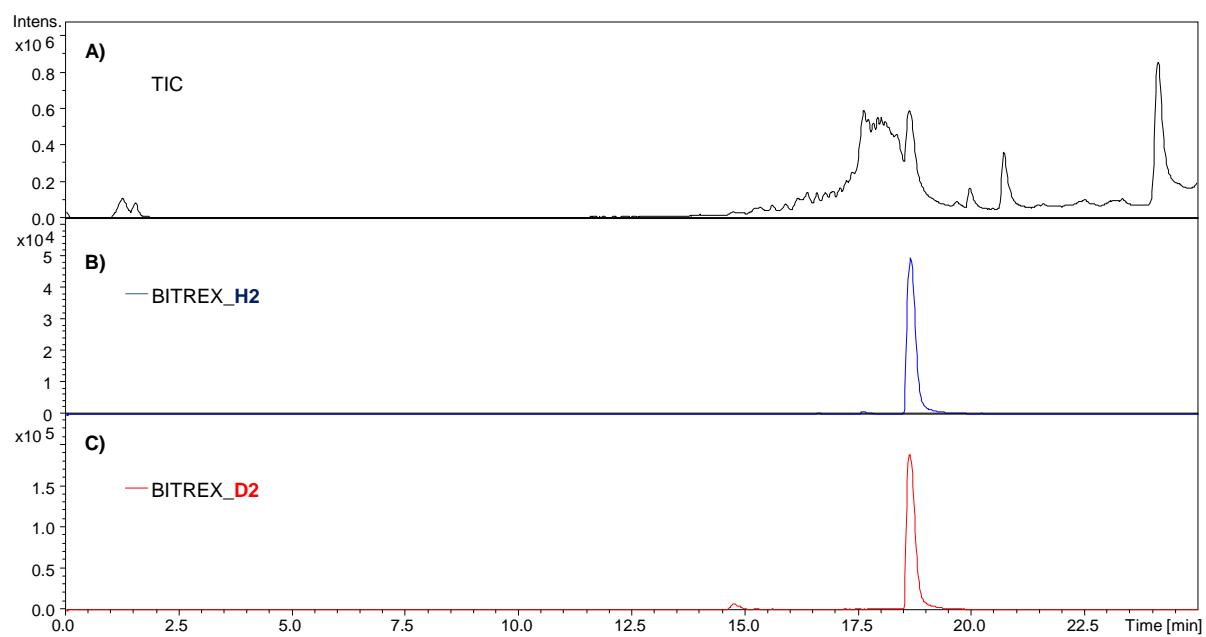

**Fig. S28** The LC-MS analysis of commercially available winter windscreen washer fluid. Total ion chromatogram (A) and extracted ion chromatograms of detected denatonium cation (B) and added deuterated standard (C)

Multiple Regression (2015-05-11 10:57:33)

Notes

Input Data

Masked Data - Values Excluded from Computations

Bad Data (missing values) -- Values that are invalid and thus not used in computations

Parameters

|   |           | Value       | Standard Error |
|---|-----------|-------------|----------------|
| C | Intercept | -9,28165E-4 | 9,92482E-4     |
|   | A         | 0,47139     | 0,00256        |
|   | B         | 0,53418     | 0,00265        |

Statistics

|                         | C          |
|-------------------------|------------|
| Number of Points        | 6          |
| Degrees of Freedom      | 3          |
| Residual Sum of Squares | 8,75808E-6 |
| Adj. R-Square           | 0,99991    |

Summary

|   | Intercept   |                | A       |                | B       |                | Statistics    |
|---|-------------|----------------|---------|----------------|---------|----------------|---------------|
|   | Value       | Standard Error | Value   | Standard Error | Value   | Standard Error | Adj. R-Square |
| C | -9,28165E-4 | 9,92482E-4     | 0,47139 | 0,00256        | 0,53418 | 0,00265        | 0,99991       |

ANOVA

|   |       | DF | Sum of Squares | Mean Square | F Value     | Prob>F     |
|---|-------|----|----------------|-------------|-------------|------------|
| C | Model | 2  | 0,16495        | 0,08248     | 28251,74893 | 3,86843E-7 |
|   | Error | 3  | 8,75808E-6     | 2,91936E-6  |             |            |
|   | Total | 5  | 0,16496        |             |             |            |

Residual vs. Independent Plot

| m/z   | ISOTOP PATTERN |       |        | NORMALIZED VALUES |          |          | OBTAINED       |         | CALCULATED ISOTOP PATTERNS |          |          |
|-------|----------------|-------|--------|-------------------|----------|----------|----------------|---------|----------------------------|----------|----------|
|       | H              | D     | LC MS  | NH                | ND       | NLC      | PARAMETERS     |         | HA                         | DB       | HA+DB    |
| 325,2 | 25689          | 379   | 58995  | 0,789435          | 0,004113 | 0,372997 | A              | 0,47139 | 0,372132                   | 0,002197 | 0,374329 |
| 326,2 | 6610           | 1149  | 16299  | 0,203128          | 0,012469 | 0,103051 | B              | 0,53418 | 0,095753                   | 0,006661 | 0,102413 |
| 327,2 | 192            | 71240 | 65685  | 0,0059            | 0,773087 | 0,415294 | R <sup>2</sup> | 0,99991 | 0,002781                   | 0,412968 | 0,415749 |
| 328,2 | 50             | 17006 | 15246  | 0,001537          | 0,184547 | 0,096393 |                |         | 0,000724                   | 0,098581 | 0,099306 |
| 329,2 | 0              | 2198  | 1741   | 0                 | 0,023852 | 0,011007 |                |         | 0                          | 0,012741 | 0,012741 |
| 330,2 | 0              | 178   | 199    | 0                 | 0,001932 | 0,001258 |                |         | 0                          | 0,001032 | 0,001032 |
|       | 32541          | 92150 | 158165 |                   |          |          |                |         |                            |          |          |

**Fig. S29** The results of computational analysis of LC-MS analysis of winter windscreen washer fluid with addition of the deuterated denatonium benzoate standard

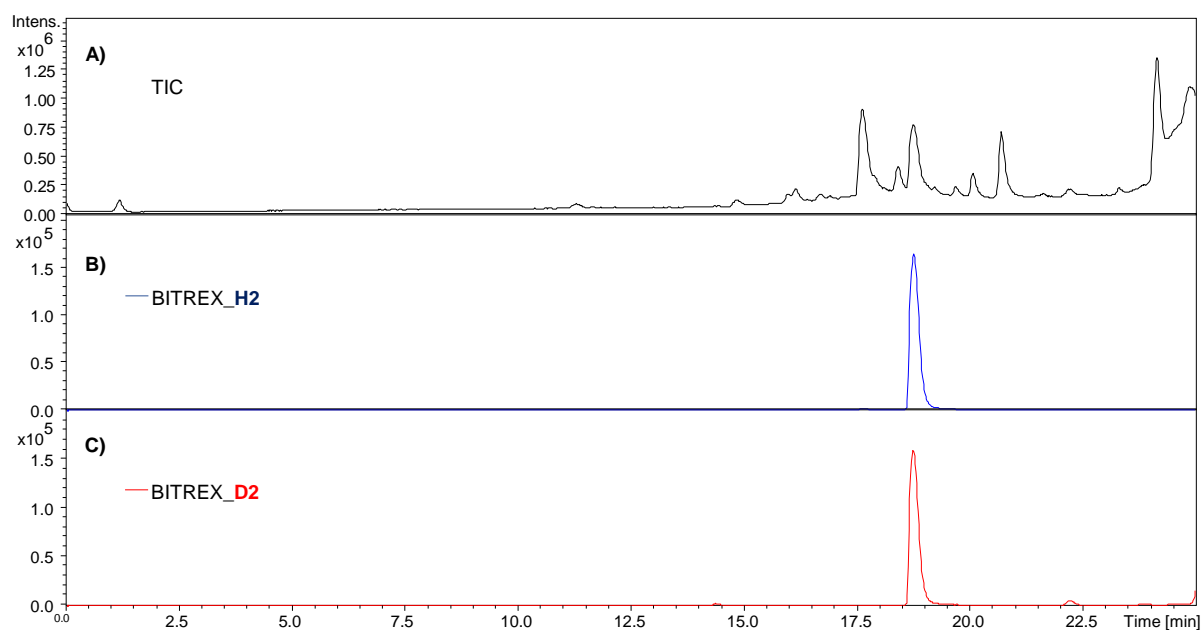

**Fig. S30** The LC-MS analysis of commercially available winter windscreen washer fluid. Total ion chromatogram (A) and extracted ion chromatograms of detected denatonium cation (B) and added deuterated standard (C)

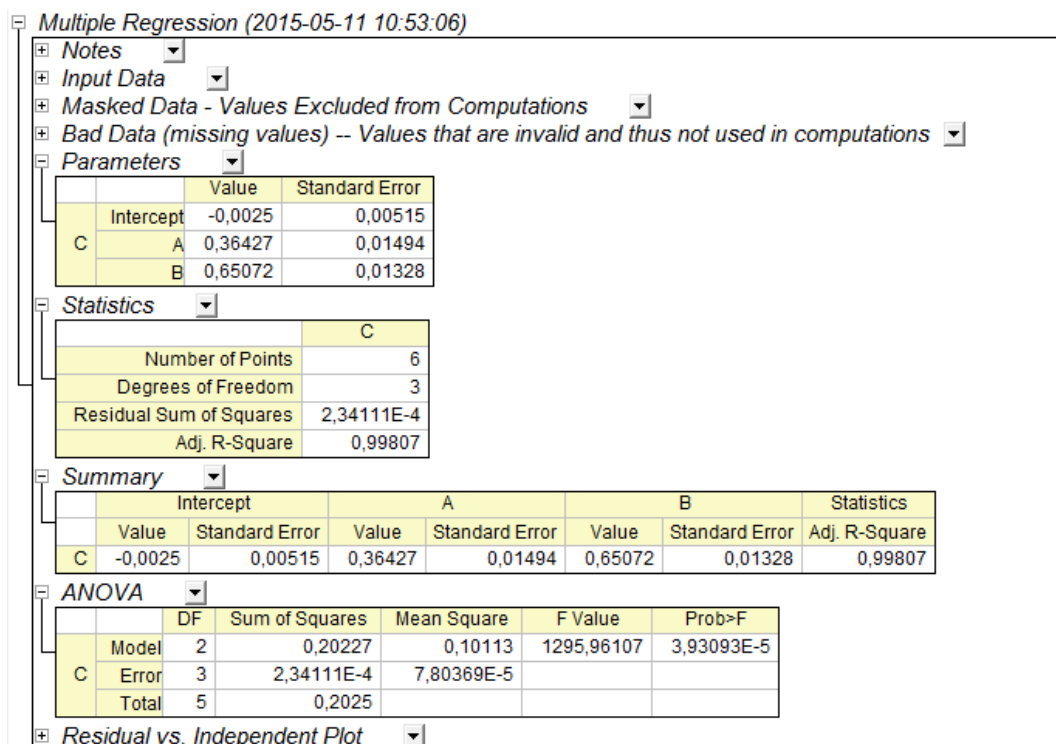

| m/z   | ISOTOP PATTERN |       |        | NORMALIZED VALUES |          |          | OBTAINED       |         | CALCULATED ISOTOP PATTERNS |           |          |
|-------|----------------|-------|--------|-------------------|----------|----------|----------------|---------|----------------------------|-----------|----------|
|       | H              | D     | LC MS  | NH                | ND       | NLC      | PARAMETERS     |         | HA                         | DB        | HA+DB    |
| 325,2 | 3246           | 379   | 41048  | 0,697614          | 0,004113 | 0,258079 | A              | 0,36427 | 0,25412                    | 0,0026763 | 0,256796 |
| 326,2 | 936            | 1149  | 10475  | 0,201161          | 0,012469 | 0,065859 | B              | 0,65072 | 0,0732768                  | 0,0081137 | 0,08139  |
| 327,2 | 397            | 71240 | 84344  | 0,085321          | 0,773087 | 0,530292 | R <sup>2</sup> | 0,99807 | 0,03108                    | 0,5030634 | 0,534143 |
| 328,2 | 74             | 17006 | 20608  | 0,015904          | 0,184547 | 0,129568 |                |         | 0,0057932                  | 0,1200884 | 0,125882 |
| 329,2 | 0              | 2198  | 2387   | 0                 | 0,023852 | 0,015008 |                |         | 0                          | 0,0155212 | 0,015521 |
| 330,2 | 0              | 178   | 190    | 0                 | 0,001932 | 0,001195 |                |         | 0                          | 0,001257  | 0,001257 |
|       | 4653           | 92150 | 159052 |                   |          |          |                |         |                            |           |          |

**Fig. S31** The results of computational analysis of LC-MS analysis of winter windscreen washer fluid with addition of the deuterated denatonium benzoate standard



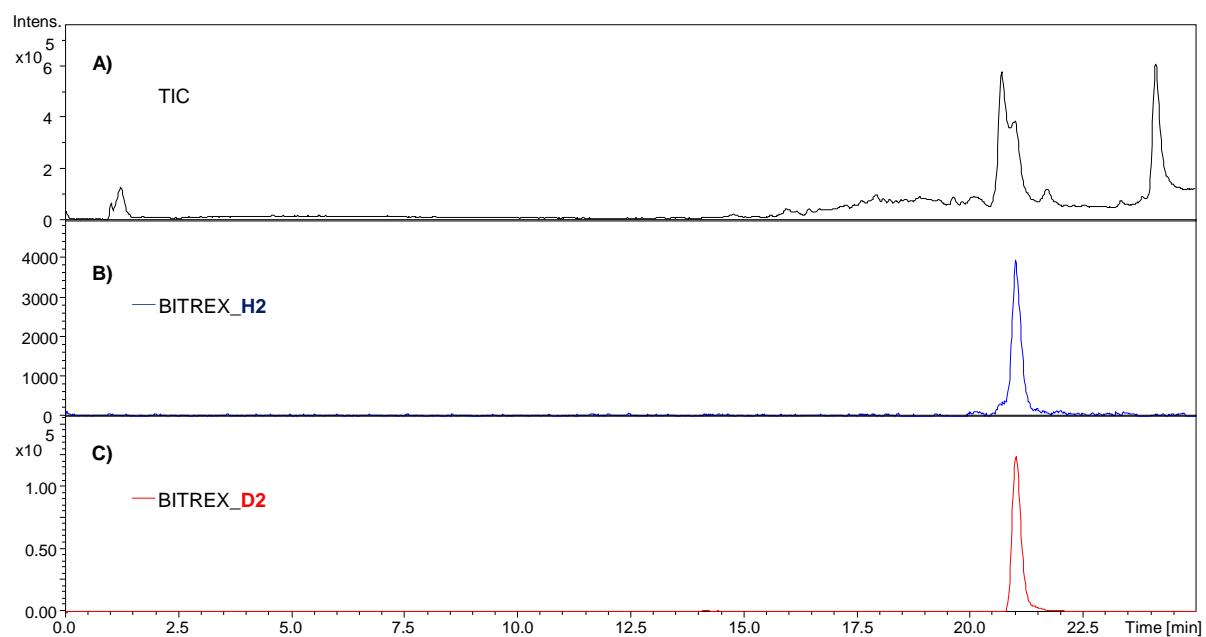

**Fig. S32** The LC-MS analysis of commercially available summer windscreen washer fluid. Total ion chromatogram (A) and extracted ion chromatograms of detected denatonium cation (B) and added deuterated standard (C)

Multiple Regression (2015-05-11 10:55:54)

Notes

Input Data

Masked Data - Values Excluded from Computations

Bad Data (missing values) -- Values that are invalid and thus not used in computations

Parameters

|   |           | Value   | Standard Error |
|---|-----------|---------|----------------|
| C | Intercept | 0,00287 | 0,00143        |
|   | A         | 0,03322 | 0,00386        |
|   | B         | 0,94954 | 0,00377        |

Statistics

|                         | C          |
|-------------------------|------------|
| Number of Points        | 6          |
| Degrees of Freedom      | 3          |
| Residual Sum of Squares | 1,79793E-5 |
| Adj. R-Square           | 0,99993    |

Summary

|   | Intercept |                | A       |                | B       |                | Statistics    |
|---|-----------|----------------|---------|----------------|---------|----------------|---------------|
|   | Value     | Standard Error | Value   | Standard Error | Value   | Standard Error | Adj. R-Square |
| C | 0,00287   | 0,00143        | 0,03322 | 0,00386        | 0,94954 | 0,00377        | 0,99993       |

ANOVA

|       | DF | Sum of Squares | Mean Square | F Value     | Prob>F     |
|-------|----|----------------|-------------|-------------|------------|
| Model | 2  | 0,41174        | 0,20587     | 34351,55399 | 2,88529E-7 |
| Error | 3  | 1,79793E-5     | 5,9931E-6   |             |            |
| Total | 5  | 0,41176        |             |             |            |

Residual vs. Independent Plot

| m/z   | ISOTOP PATTERN |       |       | NORMALIZED VALUES |          |          | OBTAINED       |         | CALCULATED ISOTOP PATTERNS |           |           |
|-------|----------------|-------|-------|-------------------|----------|----------|----------------|---------|----------------------------|-----------|-----------|
|       | H              | D     | LC MS | NH                | ND       | NLC      | PARAMETERS     |         | HA                         | DB        | HA+DB     |
| 325,2 | 1554           | 379   | 2020  | 0,748195          | 0,004113 | 0,032362 | A              | 0,03322 | 0,024855                   | 0,0039053 | 0,0287603 |
| 326,2 | 461            | 1149  | 1222  | 0,221955          | 0,012469 | 0,019578 | B              | 0,94954 | 0,007373                   | 0,0118396 | 0,019213  |
| 327,2 | 60             | 71240 | 46083 | 0,028888          | 0,773087 | 0,738297 | R <sup>2</sup> | 0,99993 | 0,00096                    | 0,7340774 | 0,735037  |
| 328,2 | 2              | 17006 | 11006 | 0,000963          | 0,184547 | 0,176327 |                |         | 3,2E-05                    | 0,1752347 | 0,1752667 |
| 329,2 | 0              | 2198  | 1764  | 0                 | 0,023852 | 0,028261 |                |         | 0                          | 0,0226488 | 0,0226488 |
| 330,2 | 0              | 178   | 323   | 0                 | 0,001932 | 0,005175 |                |         | 0                          | 0,0018342 | 0,0018342 |
|       | 2077           | 92150 | 62418 |                   |          |          |                |         |                            |           |           |

**Fig. 33S** The results of computational analysis of LC-MS analysis of summer windscreen washer fluid with addition of the deuterated denatonium benzoate standard

## References

---

1. Mikkelsen K, Nielsen SO (1960) Acidity measurements with the glass electrode in H<sub>2</sub>O-D<sub>2</sub>O mixtures. *J Phys Chem* 64:632-637
2. Mirgorodskaya OA, Kozmin YP, Titov MI, Körner R, Sönksen CP, Roepstorff P (2000) Quantitation of peptides and proteins by matrixassisted laser desorption/ionization mass spectrometry using <sup>18</sup>O-labeled internal standards. *Rapid Commun Mass Spectrom* 14:1226-1232
3. Smith MB, March J (2007) March`s Advanced Organic Chemistry: reactions, Mechanisms, Structure, 6th ed.; Wiley-Interscience, Chapter 18, pp1621-1623
4. Ng L-K, Hupe M, Harnois J, Lawrence AH (1998) Direct injection gas chromatographic/mass spectrometric analysis for denatonium benzoate in specific denatured alcohol formulations. *Anal Chem* 70:4389-4393
